# Supplementary material for: Identification of Human Tissue Kallikrein 6 as a Potential Marker of Laryngeal Cancer Based on the Relevant Secretory/Releasing Protein Database
Source: Hindawi journal article supplement (doi:10.1155/2014/594093), 2014-01-01
Supplement: f1 [file 594093.f1.pdf]

Table S1. The clinicopathological data of the laryngeal cancer cases involved in the primary tissue culture

| Case coding* | Gender | Age at diagnosis | Smoking status | Alcohol status | Histological type                    | TNM staging <sup>†</sup> | Tumor differentiation |
|--------------|--------|------------------|----------------|----------------|--------------------------------------|--------------------------|-----------------------|
| LC01         | male   | 63               | Yes            | Yes            | Supraglottic squamous cell carcinoma | T4N2M0                   | Moderate              |
| LC14         | male   | 73               | Yes            | Yes            | Supraglottic squamous cell carcinoma | T3N2M0                   | Moderate              |
| LC53         | male   | 54               | Yes            | No             | Supraglottic squamous cell carcinoma | T3N2M0                   | Moderate              |
| LC95         | male   | 50               | Yes            | Yes            | Glottic squamous cell carcinoma      | T3N1M0                   | Poor                  |

\*LC represents laryngeal cancer.

<sup>†</sup> staged according to Sixth Edition (2002) of the AJCC-UICC TNM Staging System.

Table S2. The clinical characteristics of the 149 patients with laryngeal SCC used for ELISA

| Variable          | N (%)      | Variable              | N(%)       |
|-------------------|------------|-----------------------|------------|
| Age (years)       |            | Disease stage         |            |
| ≤55               | 58 (38.9)  | I                     | 33 (22.1)  |
| >55               | 91 (61.1)  | II                    | 32 (21.5)  |
| Median (range)    | 58 (35-82) | III                   | 41 (27.5)  |
|                   |            | IV                    | 41 (27.5)  |
|                   |            | Missing               | 2 (1.3)    |
| Gender            |            | T stage*              |            |
| Male              | 140 (94.0) | T1                    | 33 (21.5)  |
| Female            | 9 (6.0)    | T2                    | 36 (24.2)  |
|                   |            | T3                    | 52 (34.9)  |
|                   |            | T4                    | 26 (17.4)  |
|                   |            | Missing               | 2 (1.3)    |
| Smoking status    |            | Lymph node status     |            |
| Ever              | 124 (83.2) | pN0                   | 110 (73.8) |
| Never             | 11 (7.4)   | pN+                   | 37 (24.8)  |
| Missing           | 14 (9.4)   | Missing               | 2 (1.3)    |
| Alcohol status    |            | Tumor differentiation |            |
| Yes               | 84 (56.4)  | well                  | 34 (22.8)  |
| No                | 51(34.2)   | moderate              | 78 (52.3)  |
| Missing           | 14 (9.4)   | poor                  | 24 (16.1)  |
|                   |            | Missing               | 13 (8.7)   |
| Anatomical region |            |                       |            |
| Glottis           | 82 (55.0)  |                       |            |
| Supraglottis      | 60 (40.3)  |                       |            |
| Subglottis        | 1 (0.7)    |                       |            |
| Missing           | 6 (4.0)    |                       |            |

\* staged according to Sixth Edition (2002) of the AJCC-UICC TNM Staging System.

Table S3. The clinical characteristics of the 70 patients as the sources of preoperative and postoperative blood samples

| Variable          | N (%)      | Variable              | N(%)      |
|-------------------|------------|-----------------------|-----------|
| Age (years)       |            | T stage*              |           |
| ≤55               | 27 (38.6)  | T1                    | 11 (15.7) |
| >55               | 43 (61.4)  | T2                    | 11 (15.7) |
| Median (range)    | 59 (40-82) | T3                    | 27 (38.6) |
|                   |            | T4                    | 17 (24.3) |
|                   |            | Missing               | 4 (5.7)   |
| Gender            |            | Lymph node status     |           |
| Male              | 68 (97.1)  | pN0                   | 43 (61.4) |
| Female            | 2 (2.9)    | pN+                   | 23 (32.9) |
|                   |            | Missing               | 4 (5.7)   |
| Anatomical region |            | Tumor differentiation |           |
| Glottis           | 36 (51.4)  | well                  | 14 (20.0) |
| Supraglottis      | 28 (40.0)  | moderate              | 41 (58.6) |
| Subglottis        | 1 (1.4)    | poor                  | 10 (14.3) |
| Missing           | 5 (7.1)    | Missing               | 5 (7.1)   |
| Disease           |            |                       |           |
| I                 | 11 (15.7)  |                       |           |
| II                | 11 (15.7)  |                       |           |
| III               | 22 (31.4)  |                       |           |
| IV                | 22 (31.4)  |                       |           |
| Missing           | 4 (5.7)    |                       |           |

\* staged according to Sixth Edition (2002) of the AJCC-UICC TNM Staging System.

Table S4. The protein identifications in all the CM samples

| Gene name | Description                                    | MW       | pI       | N1 | N14 | N53 | N95 | T1 | T14 | T53 | T95 |
|-----------|------------------------------------------------|----------|----------|----|-----|-----|-----|----|-----|-----|-----|
| CLIC1     | Chloride intracellular channel protein 1       | 26905.75 | 4.552361 | 1  | 1   | 1   | 1   | 1  | 1   | 1   | 1   |
| ACTN4     | Alpha-actinin-4                                | 104788.5 | 4.792366 | 1  | 1   | 1   | 1   | 1  | 1   | 1   | 1   |
| IDH1      | Isocitrate dehydrogenase [NADP]<br>cytoplasmic | 46629.51 | 4.901527 | 1  | 1   | 1   | 1   | 1  | 1   | 1   | 1   |
| LDHA      | L-lactate dehydrogenase A chain                | 36665.36 | 5.837837 | 1  | 1   | 1   | 1   | 1  | 1   | 1   | 1   |
| F13A1     | Coagulation factor XIII A chain                | 83214.6  | 4.660027 | 1  | 1   | 1   | 1   | 1  | 1   | 1   | 1   |
| PGK1      | Phosphoglycerate kinase 1                      | 44586.13 | 6.564583 | 1  | 1   | 1   | 1   | 1  | 1   | 1   | 1   |
| CA1       | Carbonic anhydrase 1                           | 28852.39 | 5.473824 | 1  | 1   | 1   | 1   | 1  | 1   | 1   | 1   |
|           | Ig kappa chain V-III region SIE                | 11767.84 | 4.285545 | 1  | 1   | 1   | 1   | 1  | 1   | 1   | 1   |
| IGKC      | Ig kappa chain C region                        | 11601.67 | 4.599464 | 1  | 1   | 1   | 1   | 1  | 1   | 1   | 1   |
| IGHG1     | Ig gamma-1 chain C region                      | 36083.17 | 5.57711  | 1  | 1   | 1   | 1   | 1  | 1   | 1   | 1   |
| IGHA1     | Ig alpha-1 chain C region                      | 37630.64 | 5.226448 | 1  | 1   | 1   | 1   | 1  | 1   | 1   | 1   |
| IGHA2     | Ig alpha-2 chain C region                      | 36503.01 | 5.122093 | 1  | 1   | 1   | 1   | 1  | 1   | 1   | 1   |
| LMNA      | Lamin-A/C                                      | 74094.71 | 5.645149 | 1  | 1   | 1   | 1   | 1  | 1   | 1   | 1   |
| FGG       | Fibrinogen gamma chain                         | 51478.87 | 4.340981 | 1  | 1   | 1   | 1   | 1  | 1   | 1   | 1   |
| ALB       | Serum albumin                                  | 69321.49 | 5.051598 | 1  | 1   | 1   | 1   | 1  | 1   | 1   | 1   |
| MMP1      | Interstitial collagenase                       | 53972.78 | 4.874825 | 1  | 1   | 1   | 1   | 1  | 1   | 1   | 1   |
| ALDOA     | Fructose-bisphosphate aldolase A               | 39395.31 | 5.413475 | 1  | 1   | 1   | 1   | 1  | 1   | 1   | 1   |
| ANXA1     | Annexin A1                                     | 38689.98 | 5.054909 | 1  | 1   | 1   | 1   | 1  | 1   | 1   | 1   |
| GAPDH     | Glyceraldehyde-3-phosphate dehydrogenase       | 36030.4  | 5.922539 | 1  | 1   | 1   | 1   | 1  | 1   | 1   | 1   |
| HSPB1     | Heat shock protein beta-1                      | 22768.49 | 5.121132 | 1  | 1   | 1   | 1   | 1  | 1   | 1   | 1   |
| GSN       | Gelsolin                                       | 85644.19 | 4.900246 | 1  | 1   | 1   | 1   | 1  | 1   | 1   | 1   |
| ENO1      | Alpha-enolase                                  | 47139.32 | 5.217903 | 1  | 1   | 1   | 1   | 1  | 1   | 1   | 1   |
| P4HB      | Protein disulfide-isomerase                    | 57080.67 | 4.507607 | 1  | 1   | 1   | 1   | 1  | 1   | 1   | 1   |
| ANXA2     | Annexin A2                                     | 38579.81 | 4.683418 | 1  | 1   | 1   | 1   | 1  | 1   | 1   | 1   |
| CTSL1     | Cathepsin L1                                   | 37539.67 | 4.436897 | 1  | 1   | 1   | 1   | 1  | 1   | 1   | 1   |

|          |                                       |          |          |   |   |   |   |   |   |   |   |
|----------|---------------------------------------|----------|----------|---|---|---|---|---|---|---|---|
| HSP90AA1 | Heat shock protein HSP 90-alpha       | 84606.68 | 4.575111 | 1 | 1 | 1 | 1 | 1 | 1 | 1 | 1 |
| THBS1    | Thrombospondin-1                      | 129299.6 | 4.356895 | 1 | 1 | 1 | 1 | 1 | 1 | 1 | 1 |
| HSPA1A   | Heat shock 70 kDa protein 1           | 70009.04 | 4.860725 | 1 | 1 | 1 | 1 | 1 | 1 | 1 | 1 |
| HSP90AB1 | Heat shock protein HSP 90-beta        | 83212.1  | 4.599358 | 1 | 1 | 1 | 1 | 1 | 1 | 1 | 1 |
| MMP3     | Stromelysin-1                         | 53943.29 | 4.797813 | 1 | 1 | 1 | 1 | 1 | 1 | 1 | 1 |
| VIM      | Vimentin                              | 53619.08 | 4.683418 | 1 | 1 | 1 | 1 | 1 | 1 | 1 | 1 |
| ANXA5    | Annexin A5                            | 35914.4  | 4.453026 | 1 | 1 | 1 | 1 | 1 | 1 | 1 | 1 |
| GSTP1    | Glutathione S-transferase P           | 23341.02 | 4.118065 | 1 | 1 | 1 | 1 | 1 | 1 | 1 | 1 |
| HSPA5    | 78 kDa glucose-regulated protein      | 72288.43 | 4.748039 | 1 | 1 | 1 | 1 | 1 | 1 | 1 | 1 |
| HSPA8    | Heat shock cognate 71 kDa protein     | 70854.22 | 4.825798 | 1 | 1 | 1 | 1 | 1 | 1 | 1 | 1 |
| COL6A3   | Collagen alpha-3(VI) chain            | 343452.8 | 5.171654 | 1 | 1 | 1 | 1 | 1 | 1 | 1 | 1 |
| ANXA3    | Annexin A3                            | 36352.66 | 4.764809 | 1 | 1 | 1 | 1 | 1 | 1 | 1 | 1 |
| EEF2     | Elongation factor 2                   | 95276.95 | 5.217476 | 1 | 1 | 1 | 1 | 1 | 1 | 1 | 1 |
| LCP1     | Plastin-2                             | 70244.84 | 4.675407 | 1 | 1 | 1 | 1 | 1 | 1 | 1 | 1 |
| HSP90B1  | Endoplasmic                           | 92411.34 | 4.475349 | 1 | 1 | 1 | 1 | 1 | 1 | 1 | 1 |
| EZR      | Ezrin                                 | 69369.74 | 5.085564 | 1 | 1 | 1 | 1 | 1 | 1 | 1 | 1 |
| DSP      | Desmoplakin                           | 331568.7 | 5.13694  | 1 | 1 | 1 | 1 | 1 | 1 | 1 | 1 |
| VCL      | Vinculin                              | 123721.8 | 5.229652 | 1 | 1 | 1 | 1 | 1 | 1 | 1 | 1 |
| PGAM1    | Phosphoglycerate mutase 1             | 28785.83 | 5.327278 | 1 | 1 | 1 | 1 | 1 | 1 | 1 | 1 |
| SDC1     | Syndecan-1                            | 32456.83 | 4.365013 | 1 | 1 | 1 | 1 | 1 | 1 | 1 | 1 |
| PPIB     | Peptidyl-prolyl cis-trans isomerase B | 23727.53 | 9.024773 | 1 | 1 | 1 | 1 | 1 | 1 | 1 | 1 |
| PSMA4    | Proteasome subunit alpha type-4       | 29465.18 | 4.961555 | 1 | 1 | 1 | 1 | 1 | 1 | 1 | 1 |
| MSN      | Moesin                                | 67777.79 | 5.292992 | 1 | 1 | 1 | 1 | 1 | 1 | 1 | 1 |
| TKT      | Transketolase                         | 67834.72 | 5.550835 | 1 | 1 | 1 | 1 | 1 | 1 | 1 | 1 |
| PRDX6    | Peroxiredoxin-6                       | 25019.19 | 5.206581 | 1 | 1 | 1 | 1 | 1 | 1 | 1 | 1 |
| SERPINB1 | Leukocyte elastase inhibitor          | 42714.7  | 4.986763 | 1 | 1 | 1 | 1 | 1 | 1 | 1 | 1 |
| YWHAB    | 14-3-3 protein beta/alpha             | 28064.83 | 4.288322 | 1 | 1 | 1 | 1 | 1 | 1 | 1 | 1 |
| SFN      | 14-3-3 protein sigma                  | 27756.69 | 4.292915 | 1 | 1 | 1 | 1 | 1 | 1 | 1 | 1 |

|          |                                                       |          |          |   |   |   |   |   |   |   |   |
|----------|-------------------------------------------------------|----------|----------|---|---|---|---|---|---|---|---|
| HSPA4    | Heat shock 70 kDa protein 4                           | 94271.24 | 4.676582 | 1 | 1 | 1 | 1 | 1 | 1 | 1 | 1 |
| TALDO1   | Transaldolase                                         | 37516.46 | 5.158089 | 1 | 1 | 1 | 1 | 1 | 1 | 1 | 1 |
| GDI2     | Rab GDP dissociation inhibitor beta                   | 50630.88 | 4.491585 | 1 | 1 | 1 | 1 | 1 | 1 | 1 | 1 |
| LUM      | Lumican                                               | 38404.79 | 4.608223 | 1 | 1 | 1 | 1 | 1 | 1 | 1 | 1 |
| PGD      | 6-phosphogluconate dehydrogenase, decarboxylating     | 53105.95 | 5.222282 | 1 | 1 | 1 | 1 | 1 | 1 | 1 | 1 |
| VCP      | Transitional endoplasmic reticulum ATPase             | 89265.72 | 4.834129 | 1 | 1 | 1 | 1 | 1 | 1 | 1 | 1 |
| NPEPPS   | Puromycin-sensitive aminopeptidase                    | 103210.7 | 4.693245 | 1 | 1 | 1 | 1 | 1 | 1 | 1 | 1 |
| TPI1     | Triosephosphate isomerase                             | 26652.74 | 5.462929 | 1 | 1 | 1 | 1 | 1 | 1 | 1 | 1 |
| ACTR3    | Actin-related protein 3                               | 47340.98 | 4.616768 | 1 | 1 | 1 | 1 | 1 | 1 | 1 | 1 |
| YWHAE    | 14-3-3 protein epsilon                                | 29155.42 | 4.193367 | 1 | 1 | 1 | 1 | 1 | 1 | 1 | 1 |
| HIST1H4A | Histone H4                                            | 11360.38 | 11.33447 | 1 | 1 | 1 | 1 | 1 | 1 | 1 | 1 |
| PPIA     | Peptidyl-prolyl cis-trans isomerase A                 | 18000.88 | 6.427971 | 1 | 1 | 1 | 1 | 1 | 1 | 1 | 1 |
| RPS27A   | Ubiquitin                                             | 8559.617 | 5.727928 | 1 | 1 | 1 | 1 | 1 | 1 | 1 | 1 |
| YWHAZ    | 14-3-3 protein zeta/delta                             | 27727.73 | 4.263756 | 1 | 1 | 1 | 1 | 1 | 1 | 1 | 1 |
| HBB      | Hemoglobin subunit beta                               | 15988.29 | 6.101128 | 1 | 1 | 1 | 1 | 1 | 1 | 1 | 1 |
| HBA1     | Hemoglobin subunit alpha                              | 15247.93 | 6.783974 | 1 | 1 | 1 | 1 | 1 | 1 | 1 | 1 |
| GSTO1    | Glutathione S-transferase omega-1                     | 27548.04 | 4.847694 | 1 | 1 | 1 | 1 | 1 | 1 | 1 | 1 |
| CLTC     | Clathrin heavy chain 1                                | 191492.5 | 4.581413 | 1 | 1 | 1 | 1 | 1 | 1 | 1 | 1 |
| PSME1    | Proteasome activator complex subunit 1                | 28705.01 | 5.041557 | 1 | 1 | 1 | 1 | 1 | 1 | 1 | 1 |
| PRDX1    | Peroxiredoxin-1                                       | 22096.28 | 5.780907 | 1 | 1 | 1 | 1 | 1 | 1 | 1 | 1 |
| TRAP1    | Heat shock protein 75 kDa, mitochondrial              | 80059.69 | 5.454491 | 1 | 1 | 1 | 1 | 1 | 1 | 1 | 1 |
| TGFB1    | Transforming growth factor-beta-induced protein ig-h3 | 74633.98 | 5.535027 | 1 | 1 | 1 | 1 | 1 | 1 | 1 | 1 |
| GLOD4    | Glyoxalase domain-containing protein 4                | 34771.25 | 4.656075 | 1 | 1 | 1 | 1 | 1 | 1 | 1 | 1 |
| PSMA7    | Proteasome subunit alpha type-7                       | 27869.61 | 5.300041 | 1 | 1 | 1 | 1 | 1 | 1 | 1 | 0 |
| ALDH1A1  | Retinal dehydrogenase 1                               | 54826.95 | 4.90078  | 0 | 1 | 1 | 1 | 1 | 1 | 1 | 1 |
| NP       | Purine nucleoside phosphorylase                       | 32097.16 | 5.142921 | 1 | 0 | 1 | 1 | 1 | 1 | 1 | 1 |
| IGLC1    | Ig lambda chain C regions                             | 11229.53 | 4.891914 | 1 | 1 | 1 | 1 | 1 | 1 | 1 | 0 |

|          |                                             |          |          |   |   |   |   |   |   |   |   |
|----------|---------------------------------------------|----------|----------|---|---|---|---|---|---|---|---|
| IGHG3    | Ig gamma-3 chain C region                   | 41260.36 | 5.79351  | 1 | 0 | 1 | 1 | 1 | 1 | 1 | 1 |
| IGHG4    | Ig gamma-4 chain C region                   | 35917.87 | 4.997871 | 0 | 1 | 1 | 1 | 1 | 1 | 1 | 1 |
| FGB      | Fibrinogen beta chain                       | 55892.26 | 5.143883 | 1 | 0 | 1 | 1 | 1 | 1 | 1 | 1 |
| FN1      | Fibronectin                                 | 262442.1 | 4.429314 | 1 | 1 | 1 | 1 | 1 | 1 | 1 | 0 |
| TF       | Serotransferrin                             | 76999.61 | 5.106071 | 1 | 1 | 1 | 1 | 0 | 1 | 1 | 1 |
| LTF      | Lactotransferrin                            | 78131.91 | 5.604774 | 0 | 1 | 1 | 1 | 1 | 1 | 1 | 1 |
| FTL      | Ferritin light chain                        | 20007.1  | 4.786598 | 0 | 1 | 1 | 1 | 1 | 1 | 1 | 1 |
| CSTB     | Cystatin-B                                  | 11132.59 | 5.887718 | 1 | 1 | 1 | 1 | 0 | 1 | 1 | 1 |
| S100A8   | Protein S100-A8                             | 10827.65 | 5.460152 | 1 | 1 | 1 | 1 | 0 | 1 | 1 | 1 |
| SERPINE1 | Plasminogen activator inhibitor 1           | 45031.03 | 5.595055 | 1 | 1 | 1 | 1 | 1 | 1 | 0 | 1 |
| S100A9   | Protein S100-A9                             | 13233.51 | 5.553505 | 1 | 1 | 1 | 1 | 1 | 1 | 1 | 0 |
| GPI      | Glucose-6-phosphate isomerase               | 63107.24 | 6.022835 | 0 | 1 | 1 | 1 | 1 | 1 | 1 | 1 |
| LDHB     | L-lactate dehydrogenase B chain             | 36615.14 | 4.992317 | 0 | 1 | 1 | 1 | 1 | 1 | 1 | 1 |
| CAPN1    | Calpain-1 catalytic subunit                 | 81838.19 | 4.74398  | 1 | 1 | 1 | 1 | 0 | 1 | 1 | 1 |
| DCN      | Decorin                                     | 39721.84 | 6.312187 | 0 | 1 | 1 | 1 | 1 | 1 | 1 | 1 |
| PFN1     | Profilin-1                                  | 15044.56 | 5.174644 | 0 | 1 | 1 | 1 | 1 | 1 | 1 | 1 |
| MMP2     | 72 kDa type IV collagenase                  | 73834.71 | 4.356895 | 1 | 1 | 1 | 1 | 1 | 1 | 1 | 0 |
| LAMC1    | Laminin subunit gamma-1                     | 177488.5 | 4.56913  | 0 | 1 | 1 | 1 | 1 | 1 | 1 | 1 |
| ACTN1    | Alpha-actinin-1                             | 102992.6 | 4.74868  | 0 | 1 | 1 | 1 | 1 | 1 | 1 | 1 |
| CDH1     | Epithelial cadherin                         | 97395.86 | 4.200951 | 1 | 1 | 1 | 1 | 0 | 1 | 1 | 1 |
| PDIA4    | Protein disulfide-isomerase A4              | 72886.97 | 4.442238 | 0 | 1 | 1 | 1 | 1 | 1 | 1 | 1 |
| AKR1A1   | Alcohol dehydrogenase [NADP+]               | 36549.86 | 4.850578 | 0 | 1 | 1 | 1 | 1 | 1 | 1 | 1 |
| PKM2     | Pyruvate kinase isozymes M1/M2              | 57900.02 | 6.00959  | 1 | 1 | 1 | 1 | 0 | 1 | 1 | 1 |
| GOT1     | Aspartate aminotransferase, cytoplasmic     | 46218.53 | 5.119316 | 0 | 1 | 1 | 1 | 1 | 1 | 1 | 1 |
| LGALS3   | Galectin-3                                  | 26136.05 | 4.393425 | 0 | 1 | 1 | 1 | 1 | 1 | 1 | 1 |
| TYMP     | Thymidine phosphorylase                     | 49924.17 | 5.275261 | 0 | 1 | 1 | 1 | 1 | 1 | 1 | 1 |
| OGN      | Mimecan                                     | 33900.88 | 4.623177 | 1 | 1 | 1 | 1 | 1 | 1 | 0 | 1 |
| UBA1     | Ubiquitin-like modifier-activating enzyme 1 | 117774.3 | 4.740456 | 0 | 1 | 1 | 1 | 1 | 1 | 1 | 1 |



|          |                                                                      |          |          |   |   |   |   |   |   |   |   |
|----------|----------------------------------------------------------------------|----------|----------|---|---|---|---|---|---|---|---|
| TNC      | Tenascin                                                             | 240713.2 | 4.368538 | 0 | 1 | 1 | 1 | 1 | 1 | 1 | 1 |
| EEF1G    | Elongation factor 1-gamma                                            | 50087.14 | 4.988045 | 0 | 1 | 1 | 1 | 1 | 1 | 1 | 1 |
| CALR     | Calreticulin                                                         | 48111.82 | 4.054939 | 0 | 1 | 1 | 1 | 1 | 1 | 1 | 1 |
| PEBP1    | Phosphatidylethanolamine-binding protein 1                           | 21043.67 | 4.87632  | 0 | 1 | 1 | 1 | 1 | 1 | 1 | 1 |
| PDIA3    | Protein disulfide-isomerase A3                                       | 56746.75 | 4.860298 | 0 | 1 | 1 | 1 | 1 | 1 | 1 | 1 |
| S100A11  | Protein S100-A11                                                     | 11732.82 | 4.989113 | 1 | 1 | 1 | 1 | 1 | 1 | 1 | 0 |
| PRDX2    | Peroxiredoxin-2                                                      | 21878.24 | 4.682991 | 0 | 1 | 1 | 1 | 1 | 1 | 1 | 1 |
| SERPINB5 | Serpin B5                                                            | 42111.45 | 5.245461 | 1 | 0 | 1 | 1 | 1 | 1 | 1 | 1 |
| COL18A1  | Collagen alpha-1(XVIII) chain                                        | 178077.1 | 5.186501 | 0 | 1 | 1 | 1 | 1 | 1 | 1 | 1 |
| CAPG     | Macrophage-capping protein                                           | 38493.51 | 5.059502 | 1 | 1 | 1 | 1 | 1 | 1 | 0 | 1 |
| ADH7     | Alcohol dehydrogenase class 4 mu/sigma chain                         | 39979.54 | 6.657402 | 1 | 1 | 1 | 1 | 1 | 1 | 1 | 0 |
| MDH1     | Malate dehydrogenase, cytoplasmic                                    | 36403.02 | 5.27227  | 0 | 1 | 1 | 1 | 1 | 1 | 1 | 1 |
| MDH2     | Malate dehydrogenase, mitochondrial                                  | 35480.73 | 8.062401 | 0 | 1 | 1 | 1 | 1 | 1 | 1 | 1 |
| IQGAP1   | Ras GTPase-activating-like protein IQGAP1                            | 189133.8 | 4.870659 | 0 | 1 | 1 | 1 | 1 | 1 | 1 | 1 |
| CAPZB    | F-actin-capping protein subunit beta                                 | 31330.77 | 4.582161 | 1 | 1 | 0 | 1 | 1 | 1 | 1 | 1 |
| ARHGDIA  | Rho GDP-dissociation inhibitor 1                                     | 23192.7  | 4.486351 | 0 | 1 | 1 | 1 | 1 | 1 | 1 | 1 |
| CAPZA1   | F-actin-capping protein subunit alpha-1                              | 32902.33 | 4.721336 | 0 | 1 | 1 | 1 | 1 | 1 | 1 | 1 |
| BLVRA    | Biliverdin reductase A                                               | 33407.33 | 5.342125 | 1 | 1 | 1 | 1 | 0 | 1 | 1 | 1 |
| PSMA6    | Proteasome subunit alpha type-6                                      | 27381.81 | 4.777306 | 1 | 0 | 1 | 1 | 1 | 1 | 1 | 1 |
| YWHAG    | 14-3-3 protein gamma                                                 | 28284.91 | 4.203407 | 0 | 1 | 1 | 1 | 1 | 1 | 1 | 1 |
| LCN2     | Neutrophil gelatinase-associated lipocalin                           | 22573.72 | 5.108849 | 1 | 1 | 1 | 1 | 1 | 1 | 1 | 0 |
| HSPG2    | Basement membrane-specific heparan sulfate proteoglycan core protein | 468500.5 | 5.185219 | 0 | 1 | 1 | 1 | 1 | 1 | 1 | 1 |
| COL14A1  | Collagen alpha-1(XIV) chain                                          | 193394.5 | 4.537407 | 1 | 1 | 1 | 1 | 1 | 1 | 0 | 1 |
| TGM3     | Protein-glutamine gamma-glutamyltransferase E                        | 76709.71 | 4.84182  | 1 | 1 | 1 | 1 | 0 | 1 | 1 | 1 |
| ILF2     | Interleukin enhancer-binding factor 2                                | 43035.19 | 4.836266 | 0 | 1 | 1 | 1 | 1 | 1 | 1 | 1 |
| NACA     | Nascent polypeptide-associated complex subunit alpha                 | 23369.71 | 4.424934 | 0 | 1 | 1 | 1 | 1 | 1 | 1 | 1 |

|           |                                           |          |          |   |   |   |   |   |   |   |   |
|-----------|-------------------------------------------|----------|----------|---|---|---|---|---|---|---|---|
| BLMH      | Bleomycin hydrolase                       | 52528.02 | 4.94265  | 0 | 1 | 1 | 1 | 1 | 1 | 1 | 1 |
| PDIA6     | Protein disulfide-isomerase A6            | 48091.26 | 4.556206 | 0 | 1 | 1 | 1 | 1 | 1 | 1 | 1 |
| PLEC1     | Plectin-1                                 | 531466   | 5.145699 | 0 | 1 | 1 | 1 | 1 | 1 | 1 | 1 |
| ECM1      | Extracellular matrix protein 1            | 60635.27 | 5.563118 | 1 | 1 | 1 | 1 | 1 | 1 | 1 | 0 |
| PGM2      | Phosphoglucomutase-2                      | 68240.39 | 5.017097 | 0 | 1 | 1 | 1 | 1 | 1 | 1 | 1 |
| FAM49B    | Protein FAM49B                            | 36724.65 | 4.897896 | 0 | 1 | 1 | 1 | 1 | 1 | 1 | 1 |
| DPP3      | Dipeptidyl-peptidase 3                    | 82537.8  | 4.377724 | 0 | 1 | 1 | 1 | 1 | 1 | 1 | 1 |
| SERPINB13 | Serpin B13                                | 44248.15 | 4.864357 | 1 | 1 | 1 | 1 | 1 | 1 | 1 | 0 |
| A2ML1     | Alpha-2-macroglobulin-like protein 1      | 161001.1 | 4.369499 | 1 | 1 | 1 | 1 | 1 | 1 | 0 | 0 |
| KLK10     | Kallikrein-10                             | 30118.31 | 7.076103 | 1 | 1 | 1 | 1 | 1 | 1 | 0 | 0 |
| FLNB      | Filamin-B                                 | 278021   | 4.637276 | 0 | 1 | 1 | 0 | 1 | 1 | 1 | 1 |
| PGLS      | 6-phosphogluconolactonase                 | 27529.55 | 5.247276 | 0 | 1 | 1 | 0 | 1 | 1 | 1 | 1 |
| SOD1      | Superoxide dismutase [Cu-Zn]              | 15925.9  | 5.696098 | 0 | 1 | 1 | 1 | 1 | 1 | 1 | 0 |
| GOT2      | Aspartate aminotransferase, mitochondrial | 47445.27 | 6.602287 | 0 | 1 | 1 | 1 | 0 | 1 | 1 | 1 |
| TIMP1     | Metalloproteinase inhibitor 1             | 23155.55 | 6.278862 | 1 | 1 | 1 | 1 | 1 | 1 | 0 | 0 |
| IGHG2     | Ig gamma-2 chain C region                 | 35877.76 | 5.371925 | 1 | 1 | 1 | 1 | 1 | 0 | 0 | 1 |
| KRT6A     | Keratin, type II cytoskeletal 6A          | 60008.27 | 5.035789 | 0 | 1 | 1 | 1 | 0 | 1 | 1 | 1 |
| FGA       | Fibrinogen alpha chain                    | 94914.41 | 4.889244 | 0 | 0 | 1 | 1 | 1 | 1 | 1 | 1 |
| CAT       | Catalase                                  | 59718.75 | 5.311577 | 0 | 1 | 1 | 1 | 0 | 1 | 1 | 1 |
| SOD2      | Superoxide dismutase [Mn], mitochondrial  | 24706.55 | 5.605522 | 0 | 1 | 1 | 1 | 1 | 1 | 1 | 0 |
| KRT1      | Keratin, type II cytoskeletal 1           | 65977.99 | 4.738533 | 0 | 1 | 1 | 1 | 0 | 1 | 1 | 1 |
| SERPINB2  | Plasminogen activator inhibitor 2         | 46566.15 | 4.655327 | 1 | 1 | 1 | 1 | 1 | 1 | 0 | 0 |
| RPLP0     | 60S acidic ribosomal protein P0           | 34251.8  | 5.000221 | 0 | 0 | 1 | 1 | 1 | 1 | 1 | 1 |
| ATP5B     | ATP synthase subunit beta, mitochondrial  | 56524.6  | 4.693993 | 1 | 1 | 1 | 1 | 0 | 1 | 0 | 1 |
| HIST1H2BJ | Histone H2B type 1-J                      | 13895.58 | 10.16573 | 0 | 1 | 1 | 1 | 0 | 1 | 1 | 1 |
| IVL       | Involucrin                                | 68427.18 | 4.596581 | 1 | 1 | 1 | 1 | 0 | 1 | 1 | 0 |
| ANXA4     | Annexin A4                                | 35860.12 | 4.697197 | 1 | 0 | 0 | 1 | 1 | 1 | 1 | 1 |
| LTA4H     | Leukotriene A-4 hydrolase                 | 69241.24 | 4.774529 | 0 | 1 | 1 | 1 | 1 | 1 | 0 | 1 |

|          |                                                         |          |          |   |   |   |   |   |   |   |   |
|----------|---------------------------------------------------------|----------|----------|---|---|---|---|---|---|---|---|
| ALDOC    | Fructose-bisphosphate aldolase C                        | 39431.24 | 4.916267 | 0 | 0 | 1 | 1 | 1 | 1 | 1 | 1 |
| CKMT1A   | Creatine kinase, ubiquitous mitochondrial               | 47007.21 | 5.930229 | 0 | 1 | 1 | 1 | 0 | 1 | 1 | 1 |
| PEPD     | Xaa-Pro dipeptidase                                     | 54512.91 | 4.890419 | 0 | 1 | 1 | 1 | 0 | 1 | 1 | 1 |
| XRCC6    | ATP-dependent DNA helicase 2 subunit 1                  | 69799.05 | 5.020515 | 0 | 1 | 1 | 1 | 1 | 1 | 1 | 0 |
| RNH1     | Ribonuclease inhibitor                                  | 49941.09 | 4.610466 | 0 | 1 | 1 | 1 | 1 | 1 | 1 | 0 |
| KRT10    | Keratin, type I cytoskeletal 10                         | 59474.91 | 4.259911 | 0 | 1 | 1 | 1 | 0 | 1 | 1 | 1 |
| KRT5     | Keratin, type II cytoskeletal 5                         | 62339.98 | 5.008018 | 0 | 1 | 1 | 1 | 0 | 1 | 1 | 1 |
| PLS3     | Plastin-3                                               | 70391.1  | 4.874504 | 0 | 1 | 1 | 1 | 0 | 1 | 1 | 1 |
| APEH     | Acylamino-acid-releasing enzyme                         | 81172.61 | 4.609505 | 0 | 1 | 0 | 1 | 1 | 1 | 1 | 1 |
| ANXA8    | Annexin A8                                              | 36857.65 | 4.651482 | 0 | 1 | 1 | 1 | 0 | 1 | 1 | 1 |
| ENO3     | Beta-enolase                                            | 46957.32 | 5.343193 | 0 | 1 | 1 | 0 | 1 | 1 | 1 | 1 |
| MIF      | Macrophage migration inhibitory factor                  | 12468.22 | 4.633858 | 0 | 1 | 1 | 1 | 0 | 1 | 1 | 1 |
| MMP9     | Matrix metalloproteinase-9                              | 78349.31 | 4.545311 | 1 | 0 | 1 | 1 | 1 | 0 | 1 | 1 |
| NME1     | Nucleoside diphosphate kinase A                         | 17137.67 | 5.081398 | 0 | 0 | 1 | 1 | 1 | 1 | 1 | 1 |
| HSPA6    | Heat shock 70 kDa protein 6                             | 70984.22 | 5.091545 | 1 | 1 | 1 | 0 | 1 | 1 | 0 | 1 |
| KRT4     | Keratin, type II cytoskeletal 4                         | 57249.83 | 5.151466 | 0 | 1 | 1 | 1 | 0 | 1 | 1 | 1 |
| PSMB1    | Proteasome subunit beta type-1                          | 26472.37 | 4.968071 | 0 | 1 | 1 | 1 | 1 | 1 | 1 | 0 |
| TNXB     | Tenascin-X                                              | 464164.8 | 4.624565 | 1 | 1 | 1 | 1 | 1 | 1 | 0 | 0 |
| WARS     | Tryptophanyl-tRNA synthetase, cytoplasmic               | 53131.61 | 4.826973 | 0 | 1 | 1 | 0 | 1 | 1 | 1 | 1 |
| AHCY     | Adenosylhomocysteinase                                  | 47685.2  | 4.828148 | 0 | 1 | 1 | 0 | 1 | 1 | 1 | 1 |
| CFL1     | Cofilin-1                                               | 18490.66 | 5.187996 | 0 | 1 | 1 | 1 | 1 | 1 | 1 | 0 |
| PSMA1    | Proteasome subunit alpha type-1                         | 29536.86 | 5.158836 | 1 | 0 | 0 | 1 | 1 | 1 | 1 | 1 |
| SERPINB3 | Serpin B3                                               | 44536.54 | 5.124123 | 0 | 1 | 1 | 1 | 0 | 1 | 1 | 1 |
| BLVRB    | Flavin reductase                                        | 22105.43 | 5.774071 | 0 | 1 | 1 | 1 | 0 | 1 | 1 | 1 |
| PRDX3    | Thioredoxin-dependent peroxide reductase, mitochondrial | 27675.18 | 5.954155 | 0 | 1 | 0 | 1 | 1 | 1 | 1 | 1 |
| ALDH3A1  | Aldehyde dehydrogenase, dimeric NADP-preferring         | 50346.85 | 4.791298 | 1 | 1 | 1 | 1 | 0 | 0 | 1 | 1 |
| HSPA1L   | Heat shock 70 kDa protein 1L                            | 70331.32 | 4.932076 | 0 | 1 | 1 | 0 | 1 | 1 | 1 | 1 |

|          |                                                        |          |          |   |   |   |   |   |   |   |   |
|----------|--------------------------------------------------------|----------|----------|---|---|---|---|---|---|---|---|
| MYH9     | Myosin-9                                               | 226391.6 | 5.119423 | 0 | 1 | 1 | 1 | 0 | 1 | 1 | 1 |
| NAMPT    | Nicotinamide phosphoribosyltransferase                 | 55486.59 | 4.75605  | 0 | 1 | 1 | 1 | 1 | 1 | 0 | 1 |
| PSMB2    | Proteasome subunit beta type-2                         | 22821.68 | 4.462959 | 0 | 1 | 1 | 1 | 0 | 1 | 1 | 1 |
| ARPC4    | Actin-related protein 2/3 complex subunit 4            | 19654.3  | 6.532112 | 1 | 0 | 1 | 1 | 1 | 0 | 1 | 1 |
| EEF1A1   | Elongation factor 1-alpha 1                            | 50109.11 | 6.807365 | 1 | 1 | 1 | 1 | 0 | 1 | 0 | 1 |
| HIST1H3A | Histone H3.1                                           | 15394.48 | 11.0935  | 1 | 1 | 1 | 1 | 0 | 1 | 1 | 0 |
| CAP1     | Adenylyl cyclase-associated protein 1                  | 51822.7  | 5.734337 | 0 | 0 | 1 | 1 | 1 | 1 | 1 | 1 |
| MTAP     | S-methyl-5'-thioadenosine phosphorylase                | 31215.84 | 5.859306 | 0 | 1 | 1 | 1 | 1 | 1 | 1 | 0 |
| SPTAN1   | Spectrin alpha chain, brain                            | 284364.2 | 4.942009 | 0 | 0 | 1 | 1 | 1 | 1 | 1 | 1 |
| POSTN    | Periostin                                              | 93255.27 | 5.506935 | 0 | 0 | 1 | 1 | 1 | 1 | 1 | 1 |
| RUNDC3A  | RUN domain-containing protein 3A                       | 49715.79 | 4.658424 | 1 | 0 | 1 | 1 | 1 | 1 | 0 | 1 |
| NCCRP1   | Non-specific cytotoxic cell receptor protein 1 homolog | 30827.88 | 5.516975 | 1 | 1 | 1 | 1 | 0 | 0 | 1 | 1 |
| CAND1    | Cullin-associated NEDD8-dissociated protein 1          | 136288.7 | 4.811378 | 0 | 0 | 1 | 1 | 1 | 1 | 1 | 1 |
| TXNDC5   | Thioredoxin domain-containing protein 5                | 47598.66 | 4.884438 | 1 | 0 | 0 | 1 | 1 | 1 | 1 | 1 |
| PACAP    | Proapoptotic caspase adapter protein                   | 20681.23 | 4.687904 | 0 | 1 | 0 | 1 | 1 | 1 | 1 | 1 |
| CNDP2    | Cytosolic non-specific dipeptidase                     | 52844.91 | 4.713966 | 0 | 1 | 0 | 1 | 1 | 1 | 1 | 1 |
| PARK7    | Protein DJ-1                                           | 19878.49 | 5.47126  | 0 | 1 | 1 | 1 | 1 | 1 | 1 | 0 |
| ERAP1    | Endoplasmic reticulum aminopeptidase 1                 | 107166.3 | 4.958778 | 0 | 1 | 1 | 0 | 1 | 1 | 1 | 1 |
| NUDT5    | ADP-sugar pyrophosphatase                              | 24312.24 | 4.47065  | 0 | 1 | 0 | 1 | 1 | 1 | 1 | 1 |
| PSME2    | Proteasome activator complex subunit 2                 | 27344.31 | 4.78788  | 0 | 0 | 1 | 1 | 1 | 1 | 1 | 1 |
| QSOX1    | Sulfhydryl oxidase 1                                   | 82525.5  | 6.878609 | 0 | 1 | 1 | 1 | 0 | 1 | 0 | 1 |
| GGCT     | Gamma-glutamylcyclotransferase                         | 20994.33 | 4.403999 | 0 | 0 | 1 | 0 | 1 | 1 | 1 | 1 |
| CLSTN1   | Calsyntenin-1                                          | 109723.7 | 4.482399 | 0 | 1 | 1 | 1 | 1 | 1 | 0 | 0 |
| GSR      | Glutathione reductase, mitochondrial                   | 56220.95 | 6.251732 | 0 | 1 | 0 | 1 | 1 | 1 | 1 | 0 |
| CA2      | Carbonic anhydrase 2                                   | 29227.92 | 5.69268  | 0 | 0 | 1 | 1 | 1 | 1 | 1 | 0 |
| SERPINA1 | Alpha-1-antitrypsin                                    | 46707.02 | 5.012291 | 1 | 0 | 1 | 1 | 0 | 1 | 1 | 0 |
| A2M      | Alpha-2-macroglobulin                                  | 163174.9 | 4.784035 | 1 | 0 | 1 | 1 | 1 | 1 | 0 | 0 |

|               |                                                                          |          |          |   |   |   |   |   |   |   |   |
|---------------|--------------------------------------------------------------------------|----------|----------|---|---|---|---|---|---|---|---|
| C3            | Complement C3                                                            | 187029.9 | 4.842781 | 1 | 1 | 1 | 1 | 0 | 1 | 0 | 0 |
| IGJ           | Immunoglobulin J chain                                                   | 15584.55 | 4.181938 | 0 | 1 | 1 | 1 | 1 | 1 | 0 | 0 |
| KRT14         | Keratin, type I cytoskeletal 14                                          | 51589.44 | 4.595619 | 0 | 1 | 1 | 1 | 0 | 0 | 1 | 1 |
| VWF           | von Willebrand factor                                                    | 309092   | 5.32     | 1 | 1 | 1 | 1 | 1 | 0 | 0 | 0 |
| RPN2          | Dolichyl-diphosphooligosaccharide--protein glycosyltransferase subunit 2 | 69240.97 | 4.670387 | 0 | 0 | 0 | 1 | 1 | 1 | 1 | 1 |
| MPO           | Myeloperoxidase                                                          | 83814.84 | 6.447517 | 0 | 0 | 0 | 1 | 1 | 1 | 1 | 1 |
| IL6           | Interleukin-6                                                            | 23703.14 | 5.310188 | 0 | 1 | 1 | 1 | 1 | 1 | 0 | 0 |
| CTSD          | Cathepsin D                                                              | 44523.63 | 4.373131 | 0 | 1 | 1 | 1 | 1 | 1 | 0 | 0 |
| SOD3          | Extracellular superoxide dismutase [Cu-Zn]                               | 25834.67 | 5.694817 | 1 | 1 | 1 | 1 | 0 | 1 | 0 | 0 |
| KRT19         | Keratin, type I cytoskeletal 19                                          | 44065.11 | 4.511452 | 0 | 1 | 0 | 1 | 0 | 1 | 1 | 1 |
| HNRNPA1       | Heterogeneous nuclear ribonucleoprotein A1                               | 38822.13 | 5.178169 | 0 | 0 | 1 | 1 | 0 | 1 | 1 | 1 |
| HIST1H2A<br>G | Histone H2A type 1                                                       | 14082.95 | 10.83843 | 0 | 1 | 1 | 1 | 0 | 1 | 1 | 0 |
| COL6A1        | Collagen alpha-1(VI) chain                                               | 108462   | 4.665581 | 0 | 1 | 1 | 1 | 1 | 1 | 0 | 0 |
| XRCC5         | ATP-dependent DNA helicase 2 subunit 2                                   | 82652.27 | 5.061638 | 1 | 0 | 1 | 0 | 1 | 0 | 1 | 1 |
| KRT13         | Keratin, type I cytoskeletal 13                                          | 49555.4  | 4.462105 | 0 | 1 | 1 | 1 | 0 | 0 | 1 | 1 |
| JUP           | Junction plakoglobin                                                     | 81692.73 | 4.798454 | 1 | 1 | 1 | 1 | 0 | 0 | 1 | 0 |
| CBR1          | Carbonyl reductase [NADPH] 1                                             | 30355.86 | 7.011162 | 0 | 1 | 1 | 1 | 0 | 1 | 1 | 0 |
| FAH           | Fumarylacetoacetase                                                      | 46344.21 | 5.133095 | 0 | 0 | 1 | 1 | 0 | 1 | 1 | 1 |
| KRT15         | Keratin, type I cytoskeletal 15                                          | 49167.06 | 4.410622 | 0 | 1 | 1 | 1 | 0 | 1 | 1 | 0 |
| FLNA          | Filamin-A                                                                | 280563.9 | 4.752205 | 0 | 1 | 0 | 1 | 0 | 1 | 1 | 1 |
| BGN           | Biglycan                                                                 | 41627.54 | 5.454491 | 0 | 0 | 1 | 0 | 1 | 1 | 1 | 1 |
| GPX3          | Glutathione peroxidase 3                                                 | 25499.03 | 4.985054 | 1 | 0 | 1 | 1 | 0 | 1 | 0 | 1 |
| NME2          | Nucleoside diphosphate kinase B                                          | 17286.94 | 6.09568  | 0 | 1 | 1 | 1 | 1 | 1 | 0 | 0 |
| PSMA2         | Proteasome subunit alpha type-2                                          | 25882.27 | 4.520531 | 0 | 1 | 0 | 1 | 0 | 1 | 1 | 1 |
| PTX3          | Pentraxin-related protein PTX3                                           | 41992.83 | 4.9      | 1 | 1 | 1 | 1 | 1 | 0 | 0 | 0 |
| YWHAQ         | 14-3-3 protein theta                                                     | 27746.77 | 4.211098 | 0 | 1 | 1 | 0 | 0 | 1 | 1 | 1 |
| PSMB4         | Proteasome subunit beta type-4                                           | 29185.48 | 4.22007  | 0 | 1 | 0 | 1 | 1 | 1 | 0 | 1 |

|          |                                                      |          |          |   |   |   |   |   |   |   |   |
|----------|------------------------------------------------------|----------|----------|---|---|---|---|---|---|---|---|
| S100A2   | Protein S100-A2                                      | 11109.36 | 4.454735 | 0 | 1 | 1 | 0 | 1 | 1 | 1 | 0 |
| SDC4     | Syndecan-4                                           | 21628.03 | 4.139854 | 0 | 1 | 1 | 1 | 0 | 1 | 1 | 0 |
| KRT9     | Keratin, type I cytoskeletal 9                       | 62091.91 | 4.278709 | 0 | 1 | 1 | 1 | 0 | 0 | 1 | 1 |
| CHI3L1   | Chitinase-3-like protein 1                           | 42598.4  | 5.187675 | 0 | 1 | 1 | 1 | 1 | 1 | 0 | 0 |
| TAGLN2   | Transgelin-2                                         | 22377.17 | 5.07296  | 0 | 1 | 1 | 0 | 1 | 1 | 1 | 0 |
| SERPINB9 | Serpin B9                                            | 42376.31 | 5.088234 | 0 | 1 | 1 | 0 | 1 | 1 | 0 | 1 |
| ST13     | Hsc70-interacting protein                            | 41305.48 | 4.916695 | 0 | 1 | 1 | 0 | 0 | 1 | 1 | 1 |
| AK2      | Adenylate kinase 2, mitochondrial                    | 26460.77 | 5.797142 | 1 | 0 | 0 | 1 | 1 | 1 | 1 | 0 |
| EIF3B    | Eukaryotic translation initiation factor 3 subunit B | 92423.82 | 4.590599 | 0 | 1 | 1 | 0 | 1 | 1 | 1 | 0 |
| ACTB     | Actin, cytoplasmic 1                                 | 41709.73 | 4.503334 | 0 | 1 | 0 | 1 | 0 | 1 | 1 | 1 |
| ACTR2    | Actin-related protein 2                              | 44732.23 | 4.871727 | 0 | 0 | 1 | 1 | 0 | 1 | 1 | 1 |
| RPL10A   | 60S ribosomal protein L10a                           | 24815.53 | 9.763481 | 1 | 1 | 0 | 1 | 1 | 1 | 0 | 0 |
| EIF5A    | Eukaryotic translation initiation factor 5A-1        | 16821.4  | 4.749962 | 0 | 1 | 1 | 1 | 0 | 1 | 1 | 0 |
| TUBA1B   | Tubulin alpha-1B chain                               | 50119.6  | 4.335213 | 0 | 1 | 1 | 0 | 0 | 1 | 1 | 1 |
| FABP5    | Fatty acid-binding protein, epidermal                | 15154.55 | 5.536949 | 0 | 0 | 1 | 1 | 0 | 1 | 1 | 1 |
| KRT17    | Keratin, type I cytoskeletal 17                      | 48076.04 | 4.523415 | 0 | 1 | 0 | 1 | 0 | 1 | 1 | 1 |
| CRYZ     | Quinone oxidoreductase                               | 35184.54 | 5.45385  | 0 | 1 | 0 | 0 | 1 | 1 | 1 | 1 |
| LGALS3BP | Galectin-3-binding protein                           | 65289.28 | 4.341515 | 0 | 1 | 1 | 1 | 1 | 1 | 0 | 0 |
| HNRNPD   | Heterogeneous nuclear ribonucleoprotein D0           | 38410.3  | 4.626381 | 0 | 0 | 1 | 0 | 1 | 1 | 1 | 1 |
| KPNB1    | Importin subunit beta-1                              | 97108.01 | 4.3256   | 0 | 1 | 1 | 1 | 0 | 1 | 0 | 1 |
| SF3B3    | Splicing factor 3B subunit 3                         | 135491.7 | 4.555138 | 0 | 0 | 0 | 1 | 1 | 1 | 1 | 1 |
| ERO1L    | ERO1-like protein alpha                              | 54358.05 | 4.733299 | 0 | 1 | 0 | 1 | 0 | 1 | 1 | 1 |
| FAM129B  | Niban-like protein 1                                 | 82630.93 | 4.888176 | 1 | 1 | 1 | 1 | 0 | 1 | 0 | 0 |
| VAT1     | Synaptic vesicle membrane protein VAT-1 homolog      | 41893.42 | 4.937096 | 0 | 1 | 1 | 1 | 1 | 1 | 0 | 0 |
| UGCGL1   | UDP-glucose:glycoprotein glucosyltransferase 1       | 177078   | 4.577568 | 0 | 0 | 0 | 1 | 1 | 1 | 1 | 1 |
| PIR      | Pirin                                                | 32093.26 | 5.673882 | 0 | 0 | 1 | 0 | 1 | 1 | 0 | 1 |

|               |                                                              |          |          |   |   |   |   |   |   |   |   |
|---------------|--------------------------------------------------------------|----------|----------|---|---|---|---|---|---|---|---|
| ARPC2         | Actin-related protein 2/3 complex subunit 2                  | 34311.48 | 5.300682 | 0 | 0 | 1 | 1 | 0 | 0 | 1 | 1 |
| ARPC3         | Actin-related protein 2/3 complex subunit 3                  | 20533.37 | 8.78     | 1 | 0 | 1 | 1 | 1 | 0 | 0 | 0 |
| AKR1B10       | Aldo-keto reductase family 1 member B10                      | 35997.82 | 5.344261 | 0 | 0 | 1 | 0 | 1 | 1 | 0 | 1 |
| CUTA          | Protein CutA                                                 | 19104.11 | 4.660774 | 0 | 1 | 0 | 0 | 0 | 1 | 1 | 1 |
| WDR1          | WD repeat-containing protein 1                               | 66151.87 | 4.816399 | 0 | 1 | 1 | 0 | 0 | 1 | 1 | 0 |
| CS            | Citrate synthase, mitochondrial                              | 51679.51 | 5.411125 | 0 | 1 | 0 | 0 | 1 | 1 | 0 | 1 |
| GLUD1         | Glutamate dehydrogenase 1, mitochondrial                     | 61359.19 | 5.222816 | 0 | 1 | 0 | 1 | 0 | 1 | 0 | 1 |
| ASS1          | Argininosuccinate synthase                                   | 46500.96 | 5.074883 | 0 | 1 | 1 | 0 | 0 | 1 | 1 | 0 |
|               | Ig lambda chain V-IV region Bau                              | 11298.43 | 3.158363 | 0 | 1 | 1 | 1 | 0 | 1 | 0 | 0 |
|               | Ig heavy chain V-III region BRO                              | 13218.4  | 0.995857 | 0 | 0 | 1 | 1 | 0 | 1 | 0 | 1 |
| PIGR          | Polymeric immunoglobulin receptor                            | 83231.65 | 4.657249 | 0 | 1 | 1 | 0 | 0 | 1 | 1 | 0 |
| HBD           | Hemoglobin subunit delta                                     | 16045.29 | 6.356728 | 0 | 0 | 1 | 1 | 0 | 1 | 1 | 0 |
| FTTH1         | Ferritin heavy chain                                         | 21212.29 | 4.575539 | 0 | 1 | 0 | 1 | 1 | 1 | 0 | 0 |
| APOB          | Apolipoprotein B-100                                         | 515240.8 | 5.101158 | 1 | 1 | 1 | 1 | 0 | 0 | 0 | 0 |
| HIST1H2A<br>B | Histone H2A type 1-B/E                                       | 14126.95 | 11.00004 | 0 | 1 | 0 | 0 | 0 | 1 | 1 | 1 |
| KRT8          | Keratin, type II cytoskeletal 8                              | 53671.13 | 4.774956 | 0 | 1 | 0 | 0 | 0 | 1 | 1 | 1 |
| PTMA          | Prothymosin alpha                                            | 12195.97 | 3.686119 | 0 | 0 | 1 | 0 | 0 | 1 | 1 | 1 |
| CEACAM5       | Carcinoembryonic antigen-related cell<br>adhesion molecule 5 | 76748.17 | 5.43     | 1 | 1 | 0 | 1 | 1 | 0 | 0 | 0 |
| LAMB1         | Laminin subunit beta-1                                       | 197936.6 | 4.416603 | 0 | 1 | 0 | 0 | 1 | 1 | 1 | 0 |
| ANXA6         | Annexin A6                                                   | 75825.58 | 4.739815 | 0 | 0 | 1 | 1 | 1 | 1 | 0 | 0 |
| KRT16         | Keratin, type I cytoskeletal 16                              | 51236.2  | 4.512733 | 0 | 1 | 1 | 1 | 0 | 0 | 1 | 0 |
| PTPRF         | Receptor-type tyr ine-protein ph phatase F                   | 212744.5 | 5.92     | 1 | 1 | 1 | 0 | 1 | 0 | 0 | 0 |
| ALAD          | Delta-aminolevulinic acid dehydratase                        | 36271.41 | 4.9795   | 0 | 0 | 1 | 1 | 1 | 1 | 0 | 0 |
| IL1RN         | Interleukin-1 receptor antagonist protein                    | 20041.96 | 5.23542  | 0 | 1 | 0 | 1 | 0 | 1 | 1 | 0 |
| AZU1          | Azurocidin                                                   | 26868.65 | 9.405235 | 0 | 0 | 0 | 1 | 1 | 1 | 0 | 1 |
| APEX1         | DNA-(apurinic or apyrimidinic site) lyase                    | 35532.17 | 5.294273 | 0 | 0 | 0 | 0 | 1 | 1 | 1 | 1 |
| PSMB8         | Proteasome subunit beta type-8                               | 30334.61 | 4.59124  | 0 | 0 | 1 | 1 | 0 | 1 | 1 | 0 |

|          |                                                     |          |          |   |   |   |   |   |   |   |   |
|----------|-----------------------------------------------------|----------|----------|---|---|---|---|---|---|---|---|
| PRDX5    | Peroxiredoxin-5, mitochondrial                      | 22012.49 | 8.629143 | 0 | 1 | 1 | 1 | 0 | 1 | 0 | 0 |
| DSG3     | Desmoglein-3                                        | 107435.4 | 4.38456  | 0 | 1 | 1 | 1 | 0 | 1 | 0 | 0 |
| RDX      | Radixin                                             | 68521.39 | 5.293953 | 0 | 1 | 1 | 0 | 0 | 1 | 0 | 1 |
| KRT2     | Keratin, type II cytoskeletal 2 epidermal           | 65825.39 | 5.12252  | 0 | 0 | 1 | 1 | 0 | 0 | 1 | 1 |
| GARS     | Glycyl-tRNA synthetase                              | 83086.59 | 5.21801  | 0 | 1 | 1 | 0 | 1 | 1 | 0 | 0 |
| GNPDA1   | Glucosamine-6-phosphate isomerase 1                 | 32647.58 | 5.024361 | 1 | 1 | 0 | 0 | 1 | 0 | 0 | 1 |
| CAPZA2   | F-actin-capping protein subunit alpha-2             | 32928.61 | 4.799736 | 1 | 0 | 0 | 1 | 0 | 1 | 0 | 1 |
| PREP     | Prolyl endopeptidase                                | 80648.03 | 4.353371 | 0 | 0 | 1 | 0 | 0 | 1 | 1 | 1 |
| HDGF     | Hepatoma-derived growth factor                      | 26771.87 | 4.539757 | 0 | 1 | 0 | 0 | 1 | 1 | 1 | 0 |
| ARHGDIB  | Rho GDP-dissociation inhibitor 2                    | 22973.6  | 4.602242 | 0 | 0 | 1 | 1 | 0 | 1 | 1 | 0 |
| UBE2K    | Ubiquitin-conjugating enzyme E2 K                   | 22392.57 | 4.663872 | 0 | 0 | 1 | 0 | 0 | 1 | 1 | 1 |
| LYZ      | Lysozyme C                                          | 16526.28 | 8.480034 | 0 | 1 | 0 | 1 | 0 | 1 | 0 | 1 |
| AP2B1    | AP-2 complex subunit beta-1                         | 104486   | 4.566353 | 0 | 0 | 1 | 1 | 0 | 0 | 1 | 1 |
| ACTC1    | Actin, alpha cardiac muscle 1                       | 41991.88 | 5.23     | 1 | 0 | 1 | 1 | 1 | 0 | 0 | 0 |
| CYCS     | Cytochrome c                                        | 11741.13 | 9.077003 | 0 | 1 | 1 | 0 | 1 | 1 | 0 | 0 |
| PITPNA   | Phosphatidylinositol transfer protein alpha isoform | 31786.02 | 4.892342 | 0 | 1 | 0 | 1 | 0 | 1 | 1 | 0 |
| SELENBP1 | Selenium-binding protein 1                          | 52357.62 | 4.791405 | 0 | 1 | 1 | 0 | 1 | 0 | 0 | 1 |
| PLS1     | Plastin-1                                           | 70209.26 | 4.760429 | 1 | 0 | 1 | 1 | 0 | 1 | 0 | 0 |
| GANAB    | Neutral alpha-glucosidase AB                        | 106806.6 | 4.713112 | 0 | 1 | 1 | 0 | 1 | 1 | 0 | 0 |
| MVP      | Major vault protein                                 | 99265.93 | 4.923424 | 0 | 0 | 0 | 1 | 1 | 1 | 1 | 0 |
| CLCA4    | Calcium-activated chloride channel regulator 4      | 101219.1 | 4.662056 | 1 | 1 | 1 | 1 | 0 | 0 | 0 | 0 |
| SEPT2    | Septin-2                                            | 41461.25 | 5.379829 | 0 | 0 | 1 | 1 | 0 | 1 | 0 | 1 |
| RSU1     | Ras suppressor protein 1                            | 31520.69 | 5.727928 | 0 | 1 | 0 | 1 | 0 | 1 | 1 | 0 |
| TSN      | Translin                                            | 26166.78 | 5.041878 | 0 | 0 | 0 | 1 | 0 | 1 | 1 | 1 |
| DDB1     | DNA damage-binding protein 1                        | 126887.3 | 4.570625 | 0 | 0 | 0 | 0 | 1 | 1 | 1 | 1 |
| HADH     | Hydroxyacyl-coenzyme A dehydrogenase, mitochondrial | 34255.9  | 6.462471 | 1 | 0 | 0 | 0 | 1 | 1 | 0 | 1 |



|           |                                                |          |          |   |   |   |   |   |   |   |   |
|-----------|------------------------------------------------|----------|----------|---|---|---|---|---|---|---|---|
| UGP2      | UTP--glucose-1-phosphate uridylyltransferase   | 56904.72 | 5.48568  | 0 | 1 | 0 | 0 | 1 | 1 | 0 | 1 |
| PDCD6IP   | Programmed cell death 6-interacting protein    | 95963.12 | 4.716743 | 1 | 1 | 1 | 1 | 0 | 0 | 0 | 0 |
| HSPH1     | Heat shock protein 105 kDa                     | 96803.66 | 4.85186  | 0 | 0 | 1 | 0 | 1 | 1 | 1 | 0 |
| ISOC1     | Isochorismatase domain-containing protein 1    | 32216.12 | 5.593132 | 0 | 1 | 1 | 0 | 1 | 1 | 0 | 0 |
| ABHD14B   | Abhydrolase domain-containing protein 14B      | 22331.56 | 5.039101 | 0 | 1 | 1 | 1 | 0 | 1 | 0 | 0 |
| VPS35     | Vacuolar protein sorting-associated protein 35 | 91648.93 | 4.657997 | 0 | 1 | 1 | 1 | 0 | 1 | 0 | 0 |
| LGMN      | Legumain                                       | 49379.41 | 4.704353 | 0 | 0 | 1 | 1 | 0 | 0 | 1 | 1 |
| COL12A1   | Collagen alpha-1(XII) chain                    | 332940.5 | 4.503014 | 0 | 0 | 0 | 0 | 1 | 1 | 1 | 1 |
| API5      | Apoptosis inhibitor 5                          | 57525.14 | 4.967003 | 0 | 0 | 0 | 0 | 1 | 1 | 1 | 1 |
| XPNPPEP1  | Xaa-Pro aminopeptidase 1                       | 69873.24 | 4.667397 | 0 | 1 | 0 | 1 | 0 | 1 | 0 | 1 |
| SPRR3     | Small proline-rich protein 3                   | 18142.23 | 8.076607 | 1 | 1 | 1 | 1 | 0 | 0 | 0 | 0 |
| CRNN      | Cornulin                                       | 53501.64 | 5.420738 | 1 | 1 | 1 | 1 | 0 | 0 | 0 | 0 |
| USP25     | Ubiquitin carboxyl-terminal hydrolase 25       | 125671.3 | 4.69976  | 0 | 1 | 1 | 1 | 0 | 1 | 0 | 0 |
| NAGK      | N-acetyl-D-glucosamine kinase                  | 37351.92 | 4.818855 | 0 | 1 | 0 | 1 | 0 | 1 | 0 | 1 |
| CORO1C    | Coronin-1C                                     | 53215.06 | 5.46389  | 0 | 0 | 0 | 0 | 1 | 1 | 1 | 1 |
| TLN1      | Talin-1                                        | 269599   | 5.272804 | 0 | 0 | 0 | 1 | 1 | 1 | 0 | 1 |
| HEBP2     | Heme-binding protein 2                         | 22861.19 | 4.129387 | 0 | 1 | 1 | 0 | 0 | 1 | 1 | 0 |
| PSAT1     | Phosphoserine aminotransferase                 | 40396.81 | 4.957069 | 0 | 0 | 0 | 0 | 1 | 1 | 1 | 1 |
| DDX39     | ATP-dependent RNA helicase DDX39               | 49097.95 | 4.916267 | 0 | 1 | 0 | 0 | 1 | 0 | 0 | 1 |
| IPO5      | Importin-5                                     | 123549.9 | 4.475243 | 0 | 0 | 0 | 0 | 1 | 1 | 1 | 0 |
| AGRN      | Agrin                                          | 214706.4 | 5.31414  | 0 | 0 | 1 | 0 | 1 | 0 | 1 | 0 |
| TMPRSS11D | Transmembrane protease, serine 11D             | 46234.37 | 5.581169 | 1 | 0 | 1 | 1 | 0 | 0 | 0 | 0 |
| PPL       | Periplakin                                     | 204525.9 | 5.056297 | 1 | 1 | 0 | 1 | 0 | 0 | 0 | 0 |
| SYNCRIP   | Heterogeneous nuclear ribonucleoprotein Q      | 69559.6  | 4.835304 | 0 | 0 | 0 | 0 | 0 | 1 | 1 | 1 |
| M6PRBP1   | Mannose-6-phosphate receptor-binding protein 1 | 47017.91 | 4.943398 | 0 | 1 | 1 | 0 | 0 | 0 | 0 | 1 |
| USO1      | General vesicular transport factor p115        | 107828.1 | 4.85     | 1 | 0 | 1 | 0 | 1 | 0 | 0 | 0 |
| CLIC3     | Chloride intracellular channel protein 3       | 26631.71 | 5.053734 | 0 | 1 | 1 | 1 | 0 | 0 | 0 | 0 |

|          |                                                   |          |          |   |   |   |   |   |   |   |   |
|----------|---------------------------------------------------|----------|----------|---|---|---|---|---|---|---|---|
| AGR2     | Anterior gradient protein 2 homolog               | 19966.62 | 5.541542 | 0 | 1 | 0 | 0 | 1 | 1 | 0 | 0 |
| CP       | Ceruloplasmin                                     | 122127.6 | 4.370674 | 0 | 0 | 0 | 1 | 1 | 1 | 0 | 0 |
| HPRT1    | Hypoxanthine-guanine<br>phosphoribosyltransferase | 24563.6  | 4.616341 | 0 | 0 | 0 | 0 | 1 | 1 | 1 | 0 |
| HP       | Haptoglobin                                       | 45176.56 | 4.657356 | 1 | 0 | 1 | 1 | 0 | 0 | 0 | 0 |
| CFB      | Complement factor B                               | 85478.52 | 4.870232 | 0 | 0 | 1 | 1 | 0 | 1 | 0 | 0 |
| SERPINC1 | Antithrombin-III                                  | 52568.86 | 5.065483 | 1 | 0 | 1 | 1 | 0 | 0 | 0 | 0 |
| SERPINA3 | Alpha-1-antichymotrypsin                          | 47620.54 | 4.809563 | 1 | 1 | 0 | 0 | 0 | 1 | 0 | 0 |
| CSTA     | Cystatin-A                                        | 10999.66 | 4.36544  | 1 | 1 | 1 | 0 | 0 | 0 | 0 | 0 |
|          | Ig kappa chain V-II region Cum                    | 12668.31 | 3.851677 | 0 | 0 | 1 | 1 | 0 | 1 | 0 | 0 |
| IGHM     | Ig mu chain C region                              | 49275.53 | 5.167809 | 1 | 0 | 1 | 1 | 0 | 0 | 0 | 0 |
| SLPI     | Antileukoproteinase                               | 14315.91 | 8.963142 | 0 | 0 | 1 | 1 | 0 | 1 | 0 | 0 |
| VTN      | Vitronectin                                       | 54271.17 | 4.506111 | 0 | 0 | 1 | 1 | 0 | 0 | 1 | 0 |
| SERPING1 | Plasma protease C1 inhibitor                      | 55119.39 | 6.09     | 1 | 0 | 1 | 0 | 1 | 0 | 0 | 0 |
| TPM3     | Tropomyosin alpha-3 chain                         | 32798.74 | 4.540398 | 0 | 0 | 0 | 1 | 1 | 0 | 0 | 1 |
| SERPINE2 | Glia-derived nexin                                | 43974.2  | 8.915504 | 0 | 0 | 1 | 0 | 1 | 1 | 0 | 0 |
| FH       | Fumarate hydratase, mitochondrial                 | 54602.17 | 6.242973 | 0 | 0 | 0 | 0 | 0 | 1 | 1 | 1 |
| COL1A2   | Collagen alpha-2(I) chain                         | 129209.4 | 6.620338 | 1 | 0 | 1 | 0 | 0 | 0 | 1 | 0 |
| ELA2     | Leukocyte elastase                                | 28499.79 | 9.414955 | 0 | 0 | 0 | 1 | 1 | 1 | 0 | 0 |
| CD14     | Monocyte differentiation antigen CD14             | 40050.74 | 5.555    | 0 | 0 | 1 | 1 | 0 | 0 | 1 | 0 |
| KRT7     | Keratin, type II cytoskeletal 7                   | 51386.38 | 4.964653 | 0 | 0 | 0 | 1 | 0 | 1 | 0 | 1 |
| FBP1     | Fructose-1,6-bisphosphatase 1                     | 36790.79 | 4.66291  | 0 | 1 | 0 | 1 | 0 | 1 | 0 | 0 |
| SPARC    | SPARC                                             | 34609.71 | 4.492226 | 0 | 0 | 1 | 1 | 0 | 0 | 1 | 0 |
| C4A      | Complement C4-A                                   | 192650.5 | 5.115257 | 0 | 0 | 0 | 1 | 0 | 1 | 0 | 1 |
| H2AFZ    | Histone H2A.Z                                     | 13544.55 | 10.51362 | 0 | 1 | 0 | 1 | 0 | 1 | 0 | 0 |
| C9orf14  | Putative uncharacterized protein C9orf14          | 12074.48 | 9.732613 | 0 | 1 | 0 | 1 | 0 | 1 | 0 | 0 |
| IL8      | Interleukin-8                                     | 11090.93 | 8.913689 | 0 | 0 | 1 | 1 | 0 | 0 | 1 | 0 |
| TROVE2   | 60 kDa SS-A/Ro ribonucleoprotein                  | 60631.2  | 5.970497 | 0 | 0 | 0 | 0 | 1 | 1 | 0 | 1 |
| TXN      | Thioredoxin                                       | 11729.74 | 4.686409 | 0 | 1 | 0 | 1 | 0 | 1 | 0 | 0 |

|            |                                                         |          |          |   |   |   |   |   |   |   |   |
|------------|---------------------------------------------------------|----------|----------|---|---|---|---|---|---|---|---|
| HSPD1      | 60 kDa heat shock protein, mitochondrial                | 61016.38 | 5.174858 | 1 | 1 | 0 | 0 | 0 | 1 | 0 | 0 |
| PABPC1     | Polyadenylate-binding protein 1                         | 70625.87 | 7.163475 | 0 | 0 | 0 | 1 | 1 | 0 | 0 | 1 |
| KRT3       | Keratin, type II cytoskeletal 3                         | 64464.59 | 4.772285 | 0 | 1 | 1 | 1 | 0 | 0 | 0 | 0 |
| AKR1B1     | Aldose reductase                                        | 35830.49 | 5.13192  | 1 | 0 | 0 | 0 | 1 | 0 | 0 | 1 |
| TPSAB1     | Tryptase alpha-1                                        | 30752.66 | 4.975121 | 0 | 1 | 1 | 0 | 0 | 0 | 0 | 1 |
| TIMP2      | Metalloproteinase inhibitor 2                           | 24383.13 | 5.225914 | 0 | 1 | 1 | 1 | 0 | 0 | 0 | 0 |
| CAPN2      | Calpain-2 catalytic subunit                             | 79958.81 | 4.506432 | 0 | 1 | 1 | 0 | 0 | 1 | 0 | 0 |
| HK1        | Hexokinase-1                                            | 102420.1 | 5.313179 | 0 | 1 | 0 | 1 | 0 | 1 | 0 | 0 |
| PCMT1      | Protein-L-isoaspartate(D-aspartate) O-methyltransferase | 24634.59 | 5.386879 | 0 | 1 | 0 | 0 | 0 | 1 | 1 | 0 |
| HNRNPA2 B1 | Heterogeneous nuclear ribonucleoproteins A2/B1          | 37406.73 | 4.740883 | 0 | 0 | 1 | 0 | 1 | 1 | 0 | 0 |
| TGM1       | Protein-glutamine gamma-glutamyltransferase K           | 89730.31 | 4.713646 | 1 | 0 | 1 | 0 | 0 | 0 | 1 | 0 |
| CES1       | Liver carboxylesterase 1                                | 62481.15 | 5.107567 | 0 | 1 | 0 | 0 | 1 | 0 | 1 | 0 |
| PSMA3      | Proteasome subunit alpha type-3                         | 28415.08 | 4.418312 | 0 | 0 | 0 | 1 | 1 | 1 | 0 | 0 |
| PTBP1      | Polypyrimidine tract-binding protein 1                  | 57185.64 | 6.952522 | 0 | 0 | 0 | 0 | 1 | 1 | 1 | 0 |
| TARS       | Threonyl-tRNA synthetase, cytoplasmic                   | 83381.86 | 5.069542 | 0 | 0 | 1 | 0 | 1 | 1 | 0 | 0 |
| PSMB5      | Proteasome subunit beta type-5                          | 28462.21 | 4.215797 | 0 | 0 | 0 | 1 | 0 | 1 | 1 | 0 |
| LAP3       | Cytosol aminopeptidase                                  | 56130.81 | 5.640877 | 0 | 0 | 0 | 0 | 1 | 1 | 0 | 1 |
| ERP29      | Endoplasmic reticulum protein ERp29                     | 28975.15 | 4.757439 | 0 | 1 | 0 | 0 | 1 | 1 | 0 | 0 |
| CORO1A     | Coronin-1A                                              | 50993.8  | 5.35836  | 0 | 1 | 0 | 1 | 0 | 1 | 0 | 0 |
| MAT2A      | S-adenosylmethionine synthetase isoform type-2          | 43633.33 | 4.901741 | 0 | 1 | 0 | 0 | 0 | 1 | 1 | 0 |
| PGM1       | Phosphoglucomutase-1                                    | 61410.53 | 4.926308 | 0 | 1 | 0 | 0 | 1 | 0 | 0 | 1 |
| SERPINF1   | Pigment epithelium-derived factor                       | 46313.3  | 5.024147 | 0 | 0 | 1 | 0 | 1 | 0 | 1 | 0 |
| COL15A1    | Collagen alpha-1(XV) chain                              | 141631.7 | 4.9      | 0 | 1 | 1 | 0 | 1 | 0 | 0 | 0 |
| DCI        | 3,2-trans-enoyl-CoA isomerase, mitochondrial            | 32795.24 | 5.994637 | 0 | 1 | 0 | 1 | 0 | 1 | 0 | 0 |
| PPIC       | Peptidyl-prolyl cis-trans isomerase C                   | 22748.84 | 6.188713 | 0 | 0 | 1 | 1 | 0 | 0 | 1 | 0 |

|          |                                                            |          |          |   |   |   |   |   |   |   |   |
|----------|------------------------------------------------------------|----------|----------|---|---|---|---|---|---|---|---|
| ARCN1    | Coatomer subunit delta                                     | 57174.12 | 5.190025 | 0 | 0 | 1 | 0 | 0 | 1 | 0 | 1 |
| GSS      | Glutathione synthetase                                     | 52352.26 | 4.89875  | 0 | 1 | 0 | 0 | 0 | 1 | 1 | 0 |
| FASN     | Fatty acid synthase                                        | 273227.2 | 5.132881 | 0 | 1 | 0 | 1 | 0 | 1 | 0 | 0 |
| PSMB3    | Proteasome subunit beta type-3                             | 22933.45 | 4.617409 | 0 | 0 | 1 | 1 | 0 | 1 | 0 | 0 |
| SERPINB8 | Serpin B8                                                  | 42739.19 | 5.41     | 0 | 1 | 0 | 1 | 1 | 0 | 0 | 0 |
| ANXA11   | Annexin A11                                                | 54355.07 | 4.452171 | 0 | 1 | 1 | 1 | 0 | 0 | 0 | 0 |
| STC1     | Stanniocalcin-1                                            | 27603.78 | 6.384819 | 0 | 0 | 1 | 1 | 0 | 1 | 0 | 0 |
| AKR1C2   | Aldo-keto reductase family 1 member C2                     | 36711.96 | 5.140038 | 0 | 0 | 1 | 0 | 0 | 0 | 1 | 1 |
| DEFA1    | Neutrophil defensin 1                                      | 10194.18 | 4.873436 | 0 | 0 | 0 | 1 | 1 | 0 | 1 | 0 |
| UBE2N    | Ubiquitin-conjugating enzyme E2 N                          | 17126.97 | 5.0093   | 0 | 0 | 1 | 1 | 0 | 0 | 1 | 0 |
| ARF3     | ADP-rib ylation factor 3                                   | 20587.73 | 6.84     | 1 | 0 | 0 | 1 | 1 | 0 | 0 | 0 |
| B2M      | Beta-2-microglobulin                                       | 13705.91 | 4.750069 | 0 | 0 | 1 | 1 | 0 | 1 | 0 | 0 |
| ACTG1    | Actin, cytoplasmic 2                                       | 41765.79 | 5.31     | 1 | 0 | 1 | 0 | 1 | 0 | 0 | 0 |
| TPM4     | Tropomyosin alpha-4 chain                                  | 28504.49 | 4.585045 | 0 | 1 | 0 | 0 | 0 | 1 | 1 | 0 |
| SPTBN1   | Spectrin beta chain, brain 1                               | 274438.7 | 4.995842 | 0 | 0 | 0 | 1 | 1 | 1 | 0 | 0 |
| TAGLN    | Transgelin                                                 | 22596.43 | 5.685524 | 0 | 0 | 1 | 0 | 0 | 1 | 1 | 0 |
| DSC2     | Desmocollin-2                                              | 99898.74 | 4.552361 | 1 | 0 | 1 | 1 | 0 | 0 | 0 | 0 |
| YWHAH    | 14-3-3 protein eta                                         | 28201.02 | 4.245598 | 0 | 0 | 1 | 0 | 0 | 1 | 0 | 1 |
| BAX      | Apoptosis regulator BAX                                    | 21170.76 | 4.811058 | 0 | 0 | 0 | 1 | 0 | 0 | 1 | 1 |
| ARHGAP1  | Rho GTPase-activating protein 1                            | 50404.19 | 4.724968 | 0 | 1 | 1 | 0 | 0 | 1 | 0 | 0 |
| ILF3     | Interleukin enhancer-binding factor 3                      | 95279.07 | 5.216621 | 0 | 0 | 0 | 0 | 1 | 1 | 0 | 1 |
| ECH1     | Delta(3,5)-Delta(2,4)-dienoyl-CoA isomerase, mitochondrial | 35793.38 | 5.617165 | 0 | 1 | 0 | 0 | 0 | 1 | 1 | 0 |
| UBE2V1   | Ubiquitin-conjugating enzyme E2 variant 1                  | 25780.04 | 5.822029 | 0 | 0 | 1 | 1 | 0 | 0 | 1 | 0 |
| LAMB3    | Laminin subunit beta-3                                     | 129488.6 | 5.495506 | 0 | 0 | 1 | 1 | 0 | 1 | 0 | 0 |
| LAMC2    | Laminin subunit gamma-2                                    | 130891.7 | 4.975441 | 0 | 0 | 1 | 0 | 0 | 1 | 1 | 0 |
| TRIM29   | Tripartite motif-containing protein 29                     | 65793.3  | 5.332405 | 1 | 0 | 0 | 0 | 1 | 1 | 0 | 0 |
| PTGR1    | Prostaglandin reductase 1                                  | 35846.73 | 4.927803 | 1 | 0 | 0 | 0 | 0 | 1 | 0 | 1 |
| PPP2R4   | Serine/threonine-protein phosphatase 2A                    | 40641.44 | 4.830391 | 0 | 0 | 0 | 0 | 1 | 1 | 0 | 1 |

|          |                                                                         |          |          |   |   |   |   |   |   |   |   |
|----------|-------------------------------------------------------------------------|----------|----------|---|---|---|---|---|---|---|---|
|          | regulatory subunit B'                                                   |          |          |   |   |   |   |   |   |   |   |
| SEPT7    | Septin-7                                                                | 50647.99 | 6.031166 | 0 | 0 | 0 | 1 | 0 | 1 | 0 | 1 |
| VASN     | Vasorin                                                                 | 71667.52 | 5.769157 | 0 | 1 | 1 | 1 | 0 | 0 | 0 | 0 |
| GBP6     | Guanylate-binding protein 6                                             | 72380.85 | 5.266823 | 1 | 0 | 1 | 1 | 0 | 0 | 0 | 0 |
| KRT73    | Keratin, type II cytoskeletal 73                                        | 58886.74 | 4.967323 | 0 | 1 | 0 | 1 | 0 | 0 | 0 | 1 |
| HRNR     | Hornerin                                                                | 282227.6 | 7.005287 | 0 | 0 | 1 | 1 | 0 | 0 | 0 | 1 |
| KRT78    | Keratin, type II cytoskeletal 78                                        | 56830.49 | 5.035042 | 0 | 1 | 0 | 1 | 0 | 0 | 0 | 1 |
| EVPL     | Envoplakin                                                              | 231477   | 5.581703 | 1 | 1 | 0 | 1 | 0 | 0 | 0 | 0 |
| KLK6     | Kallikrein-6                                                            | 26838.36 | 5.783363 | 1 | 0 | 1 | 1 | 0 | 0 | 0 | 0 |
| KCTD12   | BTB/POZ domain-containing protein<br>KCTD12                             | 35678.69 | 4.496178 | 0 | 1 | 1 | 0 | 0 | 1 | 0 | 0 |
| ABHD8    | Abhydrolase domain-containing protein 8                                 | 47301.09 | 5.538979 | 0 | 1 | 0 | 1 | 0 | 1 | 0 | 0 |
| ACO2     | Aconitate hydratase, mitochondrial                                      | 85371.92 | 5.605629 | 0 | 0 | 0 | 1 | 0 | 1 | 0 | 1 |
| TXNDC4   | Thioredoxin domain-containing protein 4                                 | 46941.4  | 4.558342 | 0 | 0 | 0 | 0 | 1 | 1 | 1 | 0 |
| ACAT2    | Acetyl-CoA acetyltransferase, cytosolic                                 | 41324.39 | 5.946999 | 0 | 1 | 0 | 0 | 0 | 1 | 1 | 0 |
| RNPEP    | Aminopeptidase B                                                        | 72549.46 | 4.588783 | 0 | 0 | 0 | 0 | 1 | 1 | 1 | 0 |
| MUC5B    | Mucin-5B                                                                | 590122.1 | 5.249733 | 0 | 0 | 0 | 0 | 1 | 0 | 1 | 1 |
| OLA1     | Obg-like ATPase 1                                                       | 44715.3  | 5.507683 | 0 | 0 | 0 | 1 | 0 | 0 | 1 | 1 |
| MAT2B    | Methionine adenosyltransferase 2 subunit beta                           | 37528.18 | 6.007774 | 0 | 0 | 0 | 0 | 1 | 1 | 0 | 1 |
| DMBT1    | Deleted in malignant brain tumors 1 protein                             | 260568.8 | 4.433479 | 0 | 0 | 0 | 1 | 0 | 1 | 1 | 0 |
| GTF2IRD1 | General transcription factor II-I repeat<br>domain-containing protein 1 | 105990.7 | 5.309868 | 0 | 0 | 1 | 1 | 0 | 0 | 0 | 1 |
| KLK13    | Kallikrein-13                                                           | 30550.51 | 6.182945 | 1 | 0 | 1 | 1 | 0 | 0 | 0 | 0 |
| EIF3L    | Eukaryotic translation initiation factor 3<br>subunit L                 | 66684.41 | 4.114113 | 0 | 0 | 1 | 0 | 0 | 1 | 1 | 0 |
| DRG1     | Developmentally-regulated GTP-binding<br>protein 1                      | 40516.82 | 6.221931 | 0 | 0 | 0 | 0 | 0 | 1 | 1 | 1 |
| DDTL     | D-dopachrome decarboxylase-like protein                                 | 14186.27 | 5.555962 | 0 | 0 | 0 | 0 | 0 | 1 | 1 | 0 |
| UNCX     | Homeobox protein unc-4 homolog                                          | 53656.79 | 6.12249  | 0 | 0 | 1 | 0 | 0 | 1 | 0 | 0 |
| TMPRSS11 | Transmembrane protease, serine 11E2                                     | 47656.08 | 5.80291  | 0 | 0 | 1 | 1 | 0 | 0 | 0 | 0 |

E2

|         |                                                         |          |          |   |   |   |   |   |   |   |   |
|---------|---------------------------------------------------------|----------|----------|---|---|---|---|---|---|---|---|
|         | Putative rhophilin-2-like protein                       | 65902.53 | 4.982597 | 0 | 1 | 0 | 1 | 0 | 0 | 0 | 0 |
| PSMD11  | 26S proteasome non-ATPase regulatory subunit 11         | 47434.04 | 4.889565 | 0 | 1 | 1 | 0 | 0 | 0 | 0 | 0 |
| XPO1    | Exportin-1                                              | 123306.1 | 4.92823  | 0 | 0 | 0 | 0 | 0 | 1 | 1 | 0 |
| PFAS    | Phosphoribosylformylglycinamide synthase                | 144572.8 | 5.041023 | 0 | 0 | 0 | 0 | 1 | 1 | 0 | 0 |
| TXNL1   | Thioredoxin-like protein 1                              | 32230.73 | 4.480797 | 0 | 1 | 0 | 0 | 0 | 1 | 0 | 0 |
| H2AFY   | Core histone macro-H2A.1                                | 39592.47 | 9.636909 | 0 | 0 | 0 | 1 | 0 | 1 | 0 | 0 |
| SH3BGRL | SH3 domain-binding glutamic acid-rich-like protein      | 12766.38 | 4.477592 | 0 | 1 | 0 | 0 | 0 | 1 | 0 | 0 |
| LYPLA1  | Acyl-protein thioesterase 1                             | 24653.49 | 5.621437 | 0 | 0 | 0 | 0 | 0 | 1 | 1 | 0 |
|         | CRNN                                                    | Cornulin | 53501.64 | 1 | 1 | 0 | 0 | 0 | 0 | 0 | 0 |
| LYPD3   | Ly6/PLAUR domain-containing protein 3                   | 35947.62 | 5.862511 | 1 | 0 | 1 | 0 | 0 | 0 | 0 | 0 |
| AHSA1   | Activator of 90 kDa heat shock protein ATPase homolog 1 | 38250.25 | 4.948631 | 0 | 0 | 0 | 0 | 0 | 1 | 1 | 0 |
| ASMTL   | N-acetylserotonin O-methyltransferase-like protein      | 68812.95 | 4.958244 | 0 | 0 | 0 | 0 | 1 | 0 | 1 | 0 |
| CFD     | Complement factor D                                     | 27015.86 | 6.398064 | 1 | 0 | 1 | 0 | 0 | 0 | 0 | 0 |
| INS     | Insulin                                                 | 11973.02 | 5.22     | 1 | 0 | 0 | 0 | 1 | 0 | 0 | 0 |
|         | Ig kappa chain V-I region AG                            | 11984.88 | 4.028664 | 0 | 0 | 1 | 1 | 0 | 0 | 0 | 0 |
|         | Ig kappa chain V-III region NG9 (Fragment)              | 10722.28 | 6.3      | 1 | 0 | 0 | 0 | 1 | 0 | 0 | 0 |
|         | Ig kappa chain V-IV region Len                          | 12632.19 | 3.508385 | 0 | 0 | 1 | 1 | 0 | 0 | 0 | 0 |
|         | Ig lambda chain V-I region HA                           | 11888.89 | 4.911461 | 0 | 0 | 0 | 0 | 1 | 1 | 0 | 0 |
|         | Ig heavy chain V-III region TIL                         | 12238.88 | 4.29644  | 0 | 0 | 1 | 0 | 0 | 0 | 1 | 0 |
| IGHD    | Ig delta chain C region                                 | 42227.24 | 5.96003  | 0 | 0 | 0 | 1 | 0 | 1 | 0 | 0 |
| APOH    | Beta-2-glycoprotein 1                                   | 38272.66 | 5.320549 | 0 | 0 | 1 | 1 | 0 | 0 | 0 | 0 |
| ORM1    | Alpha-1-acid glycoprotein 1                             | 23496.76 | 4.228615 | 0 | 0 | 0 | 1 | 0 | 0 | 1 | 0 |
| AHSG    | Alpha-2-HS-glycoprotein                                 | 39299.71 | 4.908897 | 0 | 0 | 1 | 0 | 0 | 1 | 0 | 0 |
| A1BG    | Alpha-1B-glycoprotein                                   | 54238.58 | 5.013786 | 1 | 0 | 0 | 1 | 0 | 0 | 0 | 0 |
| KRT6B   | Keratin, type II cytoskeletal 6B                        | 59989.26 | 5.030342 | 0 | 0 | 1 | 1 | 0 | 0 | 0 | 0 |

|         |                                            |          |          |   |   |   |   |   |   |   |   |
|---------|--------------------------------------------|----------|----------|---|---|---|---|---|---|---|---|
|         | Ig kappa chain V-III region VG (Fragment)  | 12567.3  | 4.85     | 1 | 0 | 0 | 0 | 1 | 0 | 0 | 0 |
|         | Ig kappa chain V-III region VH (Fragment)  | 12749.41 | 5.64     | 0 | 0 | 1 | 0 | 1 | 0 | 0 | 0 |
| APP     | Amyloid beta A4 protein                    | 86888.05 | 4.458046 | 0 | 0 | 1 | 0 | 0 | 1 | 0 | 0 |
| SLC25A5 | ADP/ATP translocase 2                      | 32874.17 | 8.818092 | 1 | 0 | 0 | 1 | 0 | 0 | 0 | 0 |
|         | Ig kappa chain V-II region RPMI 6410       | 14697.37 | 9.34     | 1 | 0 | 0 | 0 | 1 | 0 | 0 | 0 |
| PYGL    | Glycogen phosphorylase, liver form         | 97087.03 | 4.93795  | 0 | 1 | 0 | 0 | 0 | 1 | 0 | 0 |
| TUBB    | Tubulin beta chain                         | 49638.97 | 4.282127 | 0 | 0 | 1 | 0 | 0 | 1 | 0 | 0 |
| PRSS1   | Trypsin-1                                  | 26541.09 | 6.08     | 1 | 0 | 0 | 0 | 1 | 0 | 0 | 0 |
| PSAP    | Proactivator polypeptide                   | 58073.85 | 5.06     | 0 | 0 | 1 | 0 | 1 | 0 | 0 | 0 |
| HEXB    | Beta-hexosaminidase subunit beta           | 63071.18 | 4.729774 | 0 | 0 | 0 | 0 | 0 | 1 | 1 | 0 |
| BPGM    | Bisphosphoglycerate mutase                 | 29986.51 | 5.172615 | 0 | 1 | 0 | 0 | 0 | 1 | 0 | 0 |
| CTSB    | Cathepsin B                                | 37796.83 | 4.518501 | 0 | 0 | 1 | 1 | 0 | 0 | 0 | 0 |
| CTSG    | Cathepsin G                                | 28819.07 | 11.19    | 0 | 0 | 0 | 1 | 1 | 0 | 0 | 0 |
| INHBA   | Inhibin beta A chain                       | 47412.01 | 6.740288 | 0 | 0 | 1 | 0 | 0 | 1 | 0 | 0 |
| CFH     | Complement factor H                        | 139004.7 | 4.542747 | 0 | 0 | 1 | 1 | 0 | 0 | 0 | 0 |
| CXCL1   | Growth-regulated alpha protein             | 11294.22 | 10.45957 | 0 | 0 | 1 | 1 | 0 | 0 | 0 | 0 |
| TPM1    | Tropomy in alpha-1 chain                   | 32688.68 | 4.69     | 1 | 0 | 0 | 0 | 1 | 0 | 0 | 0 |
| DLD     | Dihydrolipoyl dehydrogenase, mitochondrial | 54115.92 | 5.806648 | 0 | 0 | 0 | 0 | 0 | 1 | 0 | 1 |
| C1S     | Complement C1s subcomponent                | 76634.8  | 4.188988 | 0 | 1 | 1 | 0 | 0 | 0 | 0 | 0 |
| PARP1   | Poly [ADP-ribose] polymerase 1             | 113012.4 | 6.115334 | 0 | 0 | 0 | 1 | 0 | 0 | 0 | 1 |
| CLU     | Clusterin                                  | 52461.01 | 5.174324 | 0 | 0 | 0 | 1 | 0 | 1 | 0 | 0 |
| PCNA    | Proliferating cell nuclear antigen         | 28750.29 | 4.257668 | 0 | 0 | 0 | 0 | 1 | 1 | 0 | 0 |
| CKB     | Creatine kinase B-type                     | 42617.32 | 4.840645 | 0 | 0 | 0 | 0 | 0 | 0 | 1 | 1 |
| VCAN    | Versican core protein                      | 372589.5 | 4.182365 | 0 | 0 | 0 | 0 | 1 | 0 | 1 | 0 |
| PRKCSH  | Glucosidase 2 subunit beta                 | 59387.82 | 4.096916 | 0 | 1 | 0 | 0 | 0 | 1 | 0 | 0 |
| IDE     | Insulin-degrading enzyme                   | 117893.3 | 4.902596 | 0 | 0 | 0 | 0 | 1 | 1 | 0 | 0 |
| CPA3    | Mast cell carboxypeptidase A               | 48668.78 | 5.521355 | 0 | 0 | 1 | 1 | 0 | 0 | 0 | 0 |
| RAC2    | Ras-related C3 botulinum toxin substrate 2 | 21415.08 | 4.762032 | 0 | 0 | 1 | 1 | 0 | 0 | 0 | 0 |

|        |                                                      |          |          |   |   |   |   |   |   |   |   |
|--------|------------------------------------------------------|----------|----------|---|---|---|---|---|---|---|---|
| ARSA   | Arylsulfatase A                                      | 53553.68 | 4.642509 | 0 | 0 | 0 | 0 | 0 | 1 | 0 | 1 |
| MUC1   | Mucin-1                                              | 121999.1 | 6.325432 | 1 | 0 | 0 | 1 | 0 | 0 | 0 | 0 |
| H2AFX  | Histone H2A.x                                        | 15135.41 | 10.6262  | 0 | 1 | 0 | 0 | 0 | 0 | 1 | 0 |
| ITGB4  | Integrin beta-4                                      | 202022.6 | 4.905693 | 0 | 0 | 0 | 0 | 0 | 0 | 1 | 1 |
| NCL    | Nucleolin                                            | 76568.36 | 4.513695 | 0 | 0 | 0 | 0 | 0 | 1 | 1 | 0 |
| ITIH2  | Inter-alpha-trypsin inhibitor heavy chain H2         | 106369.6 | 5.126686 | 0 | 0 | 1 | 0 | 0 | 0 | 1 | 0 |
| PI3    | Elafin                                               | 12261.39 | 9.143974 | 0 | 0 | 1 | 0 | 0 | 0 | 1 | 0 |
| ANXA7  | Annexin A7                                           | 52705.75 | 3.905403 | 0 | 0 | 0 | 1 | 0 | 1 | 0 | 0 |
| MX1    | Interferon-induced GTP-binding protein Mx1           | 75487.23 | 5.022758 | 0 | 0 | 0 | 0 | 0 | 1 | 0 | 1 |
| FUT3   | Galactoside 3(4)-L-fucosyltransferase                | 42090.24 | 5.8592   | 0 | 0 | 1 | 1 | 0 | 0 | 0 | 0 |
| CD9    | CD9 antigen                                          | 25398.98 | 4.923958 | 0 | 0 | 1 | 1 | 0 | 0 | 0 | 0 |
| FBLN1  | Fibulin-1                                            | 77162.35 | 4.515617 | 0 | 0 | 0 | 0 | 1 | 0 | 1 | 0 |
| AZGP1  | Zinc-alpha-2-glycoprotein                            | 33850.89 | 4.33564  | 0 | 1 | 0 | 0 | 0 | 1 | 0 | 0 |
| PSMB9  | Proteasome subunit beta type-9                       | 23249.54 | 4.203087 | 0 | 0 | 0 | 0 | 1 | 1 | 0 | 0 |
| PSMA5  | Proteasome subunit alpha type-5                      | 26394.2  | 4.517433 | 0 | 0 | 0 | 0 | 1 | 1 | 0 | 0 |
| PSMB6  | Proteasome subunit beta type-6                       | 25341.45 | 4.135796 | 0 | 0 | 1 | 1 | 0 | 0 | 0 | 0 |
| MAPK1  | Mitogen-activated protein kinase 1                   | 41363.22 | 4.818214 | 0 | 0 | 0 | 1 | 0 | 1 | 0 | 0 |
| IMPA1  | Inositol monophosphatase                             | 30169.17 | 4.70916  | 0 | 0 | 0 | 0 | 1 | 1 | 0 | 0 |
| EEF1D  | Elongation factor 1-delta                            | 31102.78 | 4.711617 | 0 | 0 | 0 | 0 | 1 | 1 | 0 | 0 |
| ADSS   | Adenylosuccinate synthetase isozyme 2                | 50065.77 | 4.864464 | 0 | 0 | 0 | 0 | 1 | 1 | 0 | 0 |
| GSTT1  | Glutathione S-transferase theta-1                    | 27317.56 | 5.35334  | 0 | 0 | 1 | 0 | 0 | 1 | 0 | 0 |
| GDI1   | Rab GDP dissociation inhibitor alpha                 | 50550.14 | 4.185677 | 0 | 0 | 0 | 0 | 0 | 1 | 1 | 0 |
| CTNNA1 | Catenin alpha-1                                      | 100008.5 | 5.224739 | 0 | 0 | 1 | 0 | 0 | 1 | 0 | 0 |
| SPRR1A | Cornifin-A                                           | 9870.877 | 8.84565  | 0 | 0 | 1 | 1 | 0 | 0 | 0 | 0 |
| THBS2  | Thrombospondin-2                                     | 129907.8 | 4.275932 | 0 | 1 | 1 | 0 | 0 | 0 | 0 | 0 |
| HSPA9  | Stress-70 protein, mitochondrial                     | 73634.77 | 5.185326 | 0 | 1 | 1 | 0 | 0 | 0 | 0 | 0 |
| EIF2S3 | Eukaryotic translation initiation factor 2 subunit 3 | 51077.22 | 6.612968 | 0 | 0 | 0 | 0 | 0 | 1 | 1 | 0 |
| AKR1C3 | Aldo-keto reductase family 1 member C3               | 36820.84 | 5.211494 | 0 | 0 | 0 | 0 | 0 | 1 | 0 | 1 |



|          |                                                             |          |          |   |   |   |   |   |   |   |   |
|----------|-------------------------------------------------------------|----------|----------|---|---|---|---|---|---|---|---|
| PAFAH1B1 | Platelet-activating factor acetylhydrolase IB subunit alpha | 46608.16 | 5.82737  | 0 | 0 | 0 | 0 | 0 | 1 | 1 | 0 |
| LGALS7   | Galectin-7                                                  | 15065.8  | 6.584129 | 0 | 1 | 1 | 0 | 0 | 0 | 0 | 0 |
| SERPINB4 | Serpin B4                                                   | 44825.48 | 5.86     | 1 | 0 | 0 | 0 | 1 | 0 | 0 | 0 |
| CCT5     | T-complex protein 1 subunit epsilon                         | 59632.81 | 5.14463  | 0 | 1 | 0 | 0 | 0 | 1 | 0 | 0 |
| ALDH9A1  | 4-trimethylaminobutyraldehyde dehydrogenase                 | 53766.98 | 4.803688 | 0 | 1 | 1 | 0 | 0 | 0 | 0 | 0 |
| SERPINH1 | Serpin H1                                                   | 46411.18 | 6.174614 | 0 | 0 | 0 | 0 | 0 | 1 | 1 | 0 |
| RAB7A    | Ras-related protein Rab-7a                                  | 23474.84 | 4.831139 | 0 | 1 | 0 | 1 | 0 | 0 | 0 | 0 |
| THOP1    | Thimet oligopeptidase                                       | 78789.48 | 4.829109 | 0 | 0 | 0 | 0 | 0 | 1 | 0 | 1 |
| ACLY     | ATP-citrate synthase                                        | 120761.9 | 6.95     | 0 | 0 | 0 | 1 | 1 | 0 | 0 | 0 |
| CTSC     | Dipeptidyl-peptidase 1                                      | 51808.25 | 4.437431 | 0 | 0 | 1 | 0 | 0 | 1 | 0 | 0 |
| EIF6     | Eukaryotic translation initiation factor 6                  | 26582.19 | 4.334679 | 0 | 0 | 0 | 0 | 0 | 1 | 1 | 0 |
| MYL6     | My in light polypeptide 6                                   | 16919.13 | 4.56     | 0 | 0 | 0 | 1 | 1 | 0 | 0 | 0 |
| EIF4A1   | Eukaryotic initiation factor 4A-I                           | 46124.55 | 4.682991 | 0 | 0 | 1 | 0 | 0 | 1 | 0 | 0 |
| S100A10  | Protein S100-A10                                            | 11195.51 | 5.855354 | 1 | 0 | 0 | 0 | 0 | 1 | 0 | 0 |
| DSTN     | Destrin                                                     | 18493.48 | 5.795433 | 0 | 0 | 1 | 0 | 0 | 0 | 1 | 0 |
| RAB10    | Ras-related protein Rab-10                                  | 22526.59 | 6.322121 | 0 | 1 | 0 | 1 | 0 | 0 | 0 | 0 |
| SNRPD1   | Small nuclear ribonucleoprotein Sm D1                       | 13273.36 | 11.5608  | 0 | 0 | 0 | 0 | 0 | 0 | 1 | 1 |
| RAB11A   | Ras-related protein Rab-11A                                 | 24378.41 | 4.845772 | 1 | 0 | 0 | 0 | 0 | 1 | 0 | 0 |
| UBE2L3   | Ubiquitin-conjugating enzyme E2 L3                          | 17850.24 | 5.784004 | 0 | 1 | 0 | 0 | 0 | 1 | 0 | 0 |
| DCD      | Dermcidin                                                   | 11276.83 | 5.624962 | 0 | 0 | 1 | 1 | 0 | 0 | 0 | 0 |
| H3F3A    | Histone H3.3                                                | 15318.5  | 11.24709 | 0 | 0 | 0 | 0 | 1 | 0 | 1 | 0 |
| HNRNPU   | Heterogeneous nuclear ribonucleoprotein U                   | 90456.97 | 4.900673 | 0 | 0 | 0 | 0 | 0 | 1 | 1 | 0 |
| EIF4G1   | Eukaryotic translation initiation factor 4 gamma 1          | 175426.4 | 4.899712 | 0 | 0 | 0 | 0 | 0 | 1 | 0 | 1 |
| GLO1     | Lactoylglutathione lyase                                    | 20764.25 | 4.562294 | 0 | 0 | 0 | 0 | 1 | 0 | 1 | 0 |
| AHNAK    | Neuroblast differentiation-associated protein AHNAK         | 628699.4 | 5.714577 | 1 | 0 | 0 | 1 | 0 | 0 | 0 | 0 |
| DPYD     | Dihydropyrimidine dehydrogenase [NADP+]                     | 111329.3 | 5.06057  | 0 | 0 | 0 | 0 | 1 | 1 | 0 | 0 |

|            |                                                     |          |          |   |   |   |   |   |   |   |   |
|------------|-----------------------------------------------------|----------|----------|---|---|---|---|---|---|---|---|
| PRDX4      | Peroxiredoxin-4                                     | 30520.81 | 4.860405 | 0 | 0 | 0 | 0 | 1 | 1 | 0 | 0 |
| PSMD2      | 26S proteasome non-ATPase regulatory subunit 2      | 100135.8 | 4.600426 | 0 | 0 | 0 | 1 | 0 | 1 | 0 | 0 |
| PKP1       | Plakophilin-1                                       | 82807.83 | 6.571312 | 0 | 0 | 1 | 0 | 0 | 0 | 1 | 0 |
| EIF4A2     | Eukaryotic initiation factor 4A-II                  | 46372.78 | 4.708092 | 0 | 0 | 0 | 0 | 1 | 1 | 0 | 0 |
| NUMA1      | Nuclear mitotic apparatus protein 1                 | 238115.2 | 5.413902 | 0 | 0 | 0 | 0 | 1 | 1 | 0 | 0 |
| PCOLCE     | Procollagen C-endopeptidase enhancer 1              | 47941.98 | 4.997551 | 0 | 0 | 1 | 0 | 0 | 0 | 1 | 0 |
| PCBP1      | Poly(rC)-binding protein 1                          | 37473.94 | 5.67762  | 0 | 0 | 1 | 1 | 0 | 0 | 0 | 0 |
| IGFBP7     | Insulin-like growth factor-binding protein 7        | 29111.44 | 6.121742 | 0 | 0 | 1 | 1 | 0 | 0 | 0 | 0 |
| LAMA4      | Laminin subunit alpha-4                             | 202400.6 | 4.901955 | 0 | 0 | 1 | 1 | 0 | 0 | 0 | 0 |
| PSMD5      | 26S proteasome non-ATPase regulatory subunit 5      | 56160.36 | 4.6894   | 0 | 0 | 1 | 0 | 0 | 0 | 0 | 1 |
| FSCN1      | Fascin                                              | 54496.05 | 5.135658 | 0 | 0 | 1 | 0 | 0 | 1 | 0 | 0 |
| KYNU       | Kynureninase                                        | 52318.18 | 5.376625 | 0 | 0 | 0 | 0 | 0 | 1 | 0 | 1 |
| LAMA3      | Laminin subunit alpha-3                             | 366414   | 5.373314 | 0 | 0 | 0 | 0 | 0 | 1 | 1 | 0 |
| HSP90AB2 P | Putative heat shock protein HSP 90-beta 2           | 44321.11 | 4.430595 | 0 | 0 | 0 | 0 | 0 | 1 | 1 | 0 |
| NAPRT1     | Nicotinate phosphoribosyltransferase                | 57542.01 | 4.84214  | 0 | 0 | 1 | 0 | 0 | 0 | 1 | 0 |
| CD109      | CD109 antigen                                       | 161587.3 | 4.555992 | 0 | 0 | 1 | 0 | 0 | 1 | 0 | 0 |
| MOBKL1A    | Mps one binder kinase activator-like 1A             | 25074.64 | 5.09037  | 0 | 0 | 0 | 0 | 1 | 1 | 0 | 0 |
| KRT74      | Keratin, type II cytoskeletal 74                    | 57829.64 | 5.314995 | 0 | 1 | 0 | 1 | 0 | 0 | 0 | 0 |
| ABI3BP     | Target of Nesh-SH3                                  | 118568.8 | 8.814781 | 0 | 0 | 1 | 1 | 0 | 0 | 0 | 0 |
| SLURP2     | Secreted Ly-6/uPAR-related protein 2                | 10152.84 | 5.845528 | 0 | 0 | 1 | 0 | 0 | 0 | 1 | 0 |
| AEBP1      | Adipocyte enhancer-binding protein 1                | 130847   | 4.61132  | 0 | 1 | 1 | 0 | 0 | 0 | 0 | 0 |
| KATNAL2    | Katanin p60 ATPase-containing subunit A-like 2      | 61214.5  | 7.22     | 1 | 0 | 0 | 0 | 1 | 0 | 0 | 0 |
| BPIL1      | Bactericidal/permeability-increasing protein-like 1 | 49141.72 | 6.251518 | 0 | 1 | 0 | 0 | 0 | 1 | 0 | 0 |
| SCFD1      | Sec1 family domain-containing protein 1             | 72334.05 | 4.748573 | 0 | 0 | 1 | 0 | 0 | 1 | 0 | 0 |
| ANP32B     | Acidic leucine-rich nuclear phosphoprotein 32       | 28770.31 | 3.870689 | 0 | 1 | 0 | 0 | 0 | 1 | 0 | 0 |

|          | family member B                                                  |          |          |   |   |   |   |   |   |   |   |
|----------|------------------------------------------------------------------|----------|----------|---|---|---|---|---|---|---|---|
| DCPS     | Scavenger mRNA-decapping enzyme DcpS                             | 38585.02 | 4.967751 | 0 | 0 | 0 | 0 | 0 | 1 | 0 | 1 |
| HNRNPAB  | Heterogeneous nuclear ribonucleoprotein A/B                      | 36202.41 | 4.572762 | 0 | 0 | 0 | 0 | 1 | 1 | 0 | 0 |
| CCT7     | T-complex protein 1 subunit eta                                  | 59328.92 | 5.557564 | 0 | 0 | 0 | 1 | 0 | 0 | 0 | 1 |
|          | Uncharacterized protein MGC16385                                 | 13715.74 | 4.32     | 1 | 0 | 0 | 0 | 1 | 0 | 0 | 0 |
| H2AFJ    | Histone H2A.J                                                    | 14010.93 | 10.9     | 1 | 0 | 0 | 0 | 1 | 0 | 0 | 0 |
| NIF3L1   | NIF3-like protein 1                                              | 41941.5  | 5.454811 | 0 | 0 | 0 | 0 | 0 | 1 | 0 | 1 |
|          | Haloacid dehalogenase-like hydrolase domain-containing protein 2 | 28517.94 | 5.84     | 0 | 0 | 0 | 1 | 1 | 0 | 0 | 0 |
| SDCBP2   | Syntenin-2                                                       | 31573.75 | 7.156319 | 1 | 0 | 0 | 1 | 0 | 0 | 0 | 0 |
| SPON1    | Spondin-1                                                        | 90913.59 | 5.85     | 0 | 0 | 1 | 0 | 1 | 0 | 0 | 0 |
| IL1F6    | Interleukin-1 family member 6                                    | 17673.01 | 5.073921 | 0 | 1 | 1 | 0 | 0 | 0 | 0 | 0 |
| ENOPH1   | Enolase-phosphatase E1                                           | 28914.47 | 4.297935 | 0 | 0 | 1 | 0 | 0 | 1 | 0 | 0 |
| AK3      | GTP:AMP phosphotransferase mitochondrial                         | 25549.55 | 5.601891 | 0 | 0 | 0 | 0 | 0 | 1 | 1 | 0 |
|          | Endoplasmic reticulum protein ERp29                              | 28975.15 |          |   |   |   |   |   |   |   |   |
|          |                                                                  |          |          | 1 | 1 | 0 | 0 | 0 | 0 | 0 | 0 |
| VDAC3    | Voltage-dependent anion-selective channel protein 3              | 30639.29 | 5.203377 | 1 | 0 | 0 | 1 | 0 | 0 | 0 | 0 |
| DERA     | Putative deoxyribose-phosphate aldolase                          | 35208.47 | 6.714226 | 0 | 0 | 0 | 0 | 0 | 1 | 0 | 1 |
| UFC1     | Ufm1-conjugating enzyme 1                                        | 19446.02 | 5.231789 | 0 | 0 | 0 | 0 | 1 | 1 | 0 | 0 |
| SCIN     | Adseverin                                                        | 80438.44 | 4.68235  | 0 | 1 | 0 | 1 | 0 | 0 | 0 | 0 |
| ARHGAP10 | Rho GTPase-activating protein 10                                 | 89318.34 | 5.622078 | 0 | 0 | 0 | 0 | 0 | 0 | 1 | 0 |
|          | Keratin-81-like protein                                          | 53375.16 | 5.085457 | 0 | 0 | 0 | 0 | 0 | 0 | 0 | 1 |
|          | NPIP-like protein ENSP00000346774                                | 25989.15 | 11.58814 | 0 | 0 | 0 | 0 | 0 | 1 | 0 | 0 |
|          | Uncharacterized protein ENSP00000361571                          | 66294.42 | 5.014534 | 0 | 0 | 1 | 0 | 0 | 0 | 0 | 0 |
|          | KRT4                                                             | 57249.83 |          |   |   |   |   |   |   |   |   |
|          |                                                                  |          |          | 0 | 1 | 0 | 0 | 0 | 0 | 0 | 0 |

|         |                                                             |                 |          |   |   |   |   |   |   |   |   |   |
|---------|-------------------------------------------------------------|-----------------|----------|---|---|---|---|---|---|---|---|---|
|         |                                                             | cytoskeletal 4  |          |   |   |   |   |   |   |   |   |   |
|         | ACTN4                                                       | Alpha-actinin-4 | 104788.5 | 0 | 1 | 0 | 0 | 0 | 0 | 0 | 0 | 0 |
| SEPT13  | Septin-13                                                   | 33130.29        | 8.76     | 0 | 0 | 0 | 0 | 1 | 0 | 0 | 0 | 0 |
| EML1    | Echinoderm microtubule-associated protein-like 1            | 89762.76        | 5.350243 | 0 | 0 | 0 | 0 | 0 | 1 | 0 | 0 | 0 |
| CACNA1A | Voltage-dependent P/Q-type calcium channel subunit alpha-1A | 282185.2        | 5.902992 | 0 | 0 | 0 | 0 | 0 | 0 | 1 | 0 | 0 |
|         | ENO1                                                        | Alpha-enolase   | 47139.32 | 0 | 1 | 0 | 0 | 0 | 0 | 0 | 0 | 0 |
| CES2    | Carboxylesterase 2                                          | 61767.23        | 5.005241 | 0 | 0 | 1 | 0 | 0 | 0 | 0 | 0 | 0 |
| PDXK    | Pyridoxal kinase                                            | 35079.91        | 4.841499 | 0 | 0 | 0 | 0 | 0 | 1 | 0 | 0 | 0 |
| COPE    | Coatomer subunit epsilon                                    | 34460.34        | 4.399406 | 0 | 0 | 0 | 0 | 0 | 1 | 0 | 0 | 0 |
| OPLAH   | 5-oxoprolinase                                              | 137370.6        | 5.285942 | 0 | 0 | 0 | 0 | 0 | 1 | 0 | 0 | 0 |
| GIPC1   | PDZ domain-containing protein GIPC1                         | 36026.69        | 5.9      | 1 | 0 | 0 | 0 | 0 | 0 | 0 | 0 | 0 |
| MYLC2B  | Myosin regulatory light chain MRLC2                         | 19766.52        | 4.472466 | 0 | 0 | 0 | 1 | 0 | 0 | 0 | 0 | 0 |
| ARPC1B  | Actin-related protein 2/3 complex subunit 1B                | 40923.41        | 7.542656 | 0 | 0 | 0 | 0 | 0 | 1 | 0 | 0 | 0 |
| EIF3H   | Eukaryotic translation initiation factor 3 subunit H        | 39905.05        | 4.869484 | 0 | 0 | 1 | 0 | 0 | 0 | 0 | 0 | 0 |
| ARPC5   | Actin-related protein 2/3 complex subunit 5                 | 16310.3         | 4.889992 | 0 | 0 | 0 | 1 | 0 | 0 | 0 | 0 | 0 |
| ZBTB24  | Zinc finger and BTB domain-containing protein 24            | 78232.82        | 6.229088 | 0 | 0 | 0 | 0 | 0 | 0 | 0 | 0 | 1 |
| TPD52L2 | Tumor protein D54                                           | 22224.27        | 5.030769 | 0 | 0 | 0 | 0 | 0 | 1 | 0 | 0 | 0 |
| CA12    | Carbonic anhydrase 12                                       | 39426.05        | 5.152321 | 0 | 0 | 0 | 0 | 0 | 1 | 0 | 0 | 0 |
| PLRG1   | Pleiotropic regulator 1                                     | 57158.1         | 6.945366 | 0 | 0 | 0 | 0 | 0 | 1 | 0 | 0 | 0 |
| NUDT21  | Cleavage and polyadenylation specificity factor subunit 5   | 26210.74        | 5.23307  | 0 | 0 | 0 | 0 | 0 | 1 | 0 | 0 | 0 |
| NRD1    | Nardilysin                                                  | 131488.5        | 4.89     | 0 | 0 | 0 | 0 | 1 | 0 | 0 | 0 | 0 |
| KALRN   | Kalirin                                                     | 339960.3        | 5.057045 | 0 | 0 | 0 | 0 | 0 | 1 | 0 | 0 | 0 |
| DIAPH1  | Protein diaphanous homolog 1                                | 141257.5        | 4.99894  | 0 | 0 | 0 | 1 | 0 | 0 | 0 | 0 | 0 |

|         |                                                              |                 |          |   |   |   |   |   |   |   |   |
|---------|--------------------------------------------------------------|-----------------|----------|---|---|---|---|---|---|---|---|
| UGDH    | UDP-glucose 6-dehydrogenase                                  | 54989.25        | 5.077232 | 0 | 0 | 0 | 0 | 0 | 0 | 0 | 1 |
| CTSL2   | Cathepsin L2                                                 | 37305.12        | 5.730492 | 0 | 0 | 0 | 0 | 0 | 1 | 0 | 0 |
|         | ACTN1                                                        | Alpha-actinin-1 | 102992.6 | 0 | 1 | 0 | 0 | 0 | 0 | 0 | 0 |
| CRTAP   | Cartilage-associated protein                                 | 46531.94        | 4.348778 | 0 | 0 | 0 | 1 | 0 | 0 | 0 | 0 |
| ATP6AP2 | Renin receptor                                               | 38983.32        | 4.603203 | 0 | 0 | 0 | 0 | 0 | 1 | 0 | 0 |
| GLRX3   | Glutaredoxin-3                                               | 37408.23        | 5.31     | 0 | 0 | 0 | 0 | 1 | 0 | 0 | 0 |
| KRT33A  | Keratin, type I cuticular Ha3-I                              | 45911.39        | 4.437752 | 0 | 0 | 0 | 1 | 0 | 0 | 0 | 0 |
| SEC14L2 | SEC14-like protein 2                                         | 46115.56        | 5.054268 | 0 | 0 | 0 | 0 | 0 | 1 | 0 | 0 |
| DDAH1   | N(G),N(G)-dimethylarginine dimethylaminohydrolase 1          | 31101.93        | 5.002998 | 0 | 0 | 0 | 0 | 0 | 1 | 0 | 0 |
| PRKD3   | Serine/threonine-protein kinase D3                           | 100406.2        | 6.42     | 1 | 0 | 0 | 0 | 0 | 0 | 0 | 0 |
| LETM1   | LETM1 and EF-hand domain-containing protein 1, mitochondrial | 83301.96        | 6.3      | 1 | 0 | 0 | 0 | 0 | 0 | 0 | 0 |
| UTS2    | Urotensin-2                                                  | 14286.44        | 7.67     | 0 | 0 | 0 | 0 | 1 | 0 | 0 | 0 |
| ABCA1   | ATP-binding cassette sub-family A member 1                   | 254123          | 4.941154 | 0 | 0 | 0 | 1 | 0 | 0 | 0 | 0 |
| KRT75   | Keratin, type II cytoskeletal 75                             | 59467.97        | 5.214058 | 0 | 0 | 0 | 1 | 0 | 0 | 0 | 0 |
| AIFM1   | Apoptosis-inducing factor 1, mitochondrial                   | 66858.91        | 6.274696 | 0 | 0 | 0 | 0 | 0 | 1 | 0 | 0 |
| DDAH2   | N(G),N(G)-dimethylarginine dimethylaminohydrolase 2          | 29625.45        | 5.506721 | 0 | 0 | 0 | 0 | 0 | 1 | 0 | 0 |
| ADH1C   | Alcohol dehydrogenase 1C                                     | 39841.67        | 8.63     | 0 | 0 | 0 | 0 | 1 | 0 | 0 | 0 |
| MT-CO2  | Cytochrome c oxidase subunit 2                               | 25548.21        | 4.67     | 1 | 0 | 0 | 0 | 0 | 0 | 0 | 0 |
| EGFR    | Epidermal growth factor receptor                             | 134190.3        | 6.26     | 0 | 0 | 0 | 0 | 1 | 0 | 0 | 0 |
| F2      | Prothrombin                                                  | 69992.12        | 4.791832 | 0 | 0 | 0 | 0 | 0 | 1 | 0 | 0 |
| C1R     | Complement C1r subcomponent                                  | 80066.81        | 4.481331 | 0 | 0 | 1 | 0 | 0 | 0 | 0 | 0 |
| ADA     | Adenosine deaminase                                          | 40738.66        | 4.665794 | 0 | 0 | 0 | 0 | 0 | 1 | 0 | 0 |
| CST3    | Cystatin-C                                                   | 15789.08        | 6.808968 | 0 | 0 | 1 | 0 | 0 | 0 | 0 | 0 |
| LDLR    | Low-density lipoprotein receptor                             | 95313.63        | 4.544563 | 0 | 0 | 0 | 0 | 0 | 1 | 0 | 0 |
|         | Ig lambda chain V-I region NIG-64                            | 11446.54        | 4.66     | 0 | 0 | 0 | 0 | 1 | 0 | 0 | 0 |
|         | Ig lambda chain V-III region SH                              | 11385.59        | 4.367256 | 0 | 0 | 0 | 0 | 0 | 1 | 0 | 0 |

|        |                                                         |                                 |          |   |   |   |   |   |   |   |   |
|--------|---------------------------------------------------------|---------------------------------|----------|---|---|---|---|---|---|---|---|
|        | Ig heavy chain V-III region POM                         | 12916.23                        | 8.05     | 0 | 0 | 0 | 0 | 1 | 0 | 0 | 0 |
|        | Ig heavy chain V-III region GAL                         | 12628.06                        | 4.563683 | 0 | 0 | 0 | 0 | 0 | 0 | 0 | 1 |
| HLA-B  | HLA class I histocompatibility antigen, B-7 alpha chain | 40434.95                        | 4.589745 | 0 | 0 | 0 | 0 | 0 | 0 | 1 | 0 |
| COL1A1 | Collagen alpha-1(I) chain                               | 138826.6                        | 5.127968 | 0 | 0 | 0 | 0 | 0 | 0 | 1 | 0 |
| APOA1  | Apolipoprotein A-I                                      | 30758.93                        | 5.56     | 1 | 0 | 0 | 0 | 0 | 0 | 0 | 0 |
| SLC4A1 | Band 3 anion transport protein                          | 101727.4                        | 4.569237 | 0 | 0 | 0 | 1 | 0 | 0 | 0 | 0 |
| APCS   | Serum amyloid P-component                               | 25371.13                        | 4.415535 | 0 | 0 | 1 | 0 | 0 | 0 | 0 | 0 |
| C1QC   | Complement C1q subcomponent subunit C                   | 25757.14                        | 8.61     | 1 | 0 | 0 | 0 | 0 | 0 | 0 | 0 |
| AMBP   | Protein AMBP                                            | 38973.98                        | 5.95     | 1 | 0 | 0 | 0 | 0 | 0 | 0 | 0 |
| TFRC   | Transferrin receptor protein 1                          | 84817.94                        | 4.771751 | 0 | 0 | 0 | 0 | 0 | 0 | 1 | 0 |
| HPX    | Hemopexin                                               | 51643.27                        | 6.55     | 1 | 0 | 0 | 0 | 0 | 0 | 0 | 0 |
| C4BPA  | C4b-binding protein alpha chain                         | 66989.4                         | 5.069221 | 0 | 0 | 1 | 0 | 0 | 0 | 0 | 0 |
| SEMG1  | Semenogelin-1                                           | 52099.88                        | 6.897835 | 0 | 0 | 0 | 0 | 0 | 0 | 1 | 0 |
|        | P4HB                                                    | Protein disulfide-isomerase     | 57080.67 |   | 0 | 1 | 0 | 0 | 0 | 0 | 0 |
| HLA-A  | HLA class I histocompatibility antigen, A-3 alpha chain | 40815.17                        | 4.667183 | 0 | 0 | 0 | 0 | 0 | 1 | 0 | 0 |
| CAPNS1 | Calpain small subunit 1                                 | 28297.73                        | 4.497887 | 0 | 0 | 0 | 0 | 0 | 1 | 0 | 0 |
| AMY1A  | Alpha-amylase 1                                         | 57730.91                        | 4.745049 | 0 | 0 | 1 | 0 | 0 | 0 | 0 | 0 |
| APOD   | Apolipoprotein D                                        | 21261.76                        | 5.06     | 1 | 0 | 0 | 0 | 0 | 0 | 0 | 0 |
|        | LDHB                                                    | L-lactate dehydrogenase B chain | 36615.14 |   | 0 | 1 | 0 | 0 | 0 | 0 | 0 |
| EIF2S1 | Eukaryotic translation initiation factor 2 subunit 1    | 36089.37                        | 4.558235 | 0 | 0 | 0 | 0 | 0 | 1 | 0 | 0 |
| RPLP1  | 60S acidic ribosomal protein P1                         | 11506.69                        | 4.26     | 0 | 0 | 0 | 0 | 1 | 0 | 0 | 0 |

|          |                                                                    |                                            |          |   |   |   |   |   |   |   |   |
|----------|--------------------------------------------------------------------|--------------------------------------------|----------|---|---|---|---|---|---|---|---|
| SSB      | Lupus La protein                                                   | 46808.16                                   | 5.715004 | 0 | 0 | 0 | 0 | 0 | 1 | 0 | 0 |
| KRT18    | Keratin, type I cytoskeletal 18                                    | 48028.54                                   | 4.819923 | 0 | 0 | 0 | 0 | 0 | 1 | 0 | 0 |
| UROD     | Uroporphyrinogen decarboxylase                                     | 40760.83                                   | 5.77     | 0 | 0 | 0 | 0 | 1 | 0 | 0 | 0 |
| IGKV4-1  | Ig kappa chain V-IV region (Fragment)                              | 13371.59                                   | 5.09     | 0 | 0 | 0 | 0 | 1 | 0 | 0 | 0 |
| NPM1     | Nucleophosmin                                                      | 32554.84                                   | 4.513481 | 0 | 0 | 0 | 0 | 0 | 1 | 0 | 0 |
|          | YWHAE                                                              | 14-3-3 protein epsilon                     | 29155.42 | 0 | 1 | 0 | 0 | 0 | 0 | 0 | 0 |
| C8G      | Complement component C8 gamma chain                                | 22263.54                                   | 5.679329 | 0 | 0 | 0 | 1 | 0 | 0 | 0 | 0 |
| GUSB     | Beta-glucuronidase                                                 | 74684.69                                   | 6.54     | 0 | 0 | 0 | 0 | 1 | 0 | 0 | 0 |
|          | PEBP1                                                              | Phosphatidylethanolamine-binding protein 1 | 21043.67 | 0 | 1 | 0 | 0 | 0 | 0 | 0 | 0 |
| HMBS     | Porphobilinogen deaminase                                          | 39305.61                                   | 6.233147 | 0 | 0 | 0 | 0 | 0 | 1 | 0 | 0 |
| GNAI3    | Guanine nucleotide-binding protein G(k) subunit alpha              | 40506.27                                   | 4.630013 | 0 | 0 | 0 | 1 | 0 | 0 | 0 | 0 |
| ENO2     | Gamma-enolase                                                      | 47239                                      | 4.464027 | 0 | 0 | 0 | 0 | 0 | 1 | 0 | 0 |
| MMP7     | Matrilysin                                                         | 29657.87                                   | 5.168129 | 0 | 0 | 0 | 0 | 0 | 1 | 0 | 0 |
| MMP10    | Stromelysin-2                                                      | 54116.79                                   | 4.556206 | 0 | 0 | 0 | 0 | 0 | 1 | 0 | 0 |
| LGALS1   | Galectin-1                                                         | 14706.2                                    | 4.915306 | 0 | 0 | 1 | 0 | 0 | 0 | 0 | 0 |
| RBP1     | Retinol-binding protein 1                                          | 15839.9                                    | 4.685661 | 0 | 0 | 0 | 0 | 0 | 0 | 0 | 1 |
| TACSTD2  | Tumor-associated calcium signal transducer 2                       | 35686.62                                   | 8.246758 | 0 | 0 | 0 | 0 | 0 | 1 | 0 | 0 |
| CSF3     | Granulocyte colony-stimulating factor                              | 22278.51                                   | 5.043587 | 0 | 0 | 1 | 0 | 0 | 0 | 0 | 0 |
|          | Putative heterogeneous nuclear ribonucleoprotein A1-like protein 3 | 34202.28                                   | 9.23     | 0 | 0 | 0 | 0 | 1 | 0 | 0 | 0 |
| HNRPA1L3 |                                                                    |                                            |          |   |   |   |   |   |   |   |   |
| GAA      | Lysosomal alpha-glucosidase                                        | 105270.8                                   | 4.652229 | 0 | 0 | 0 | 0 | 0 | 1 | 0 | 0 |
| HLA-B    | HLA class I histocompatibility antigen, B-58 alpha chain           | 40312.04                                   | 4.712685 | 0 | 0 | 0 | 0 | 0 | 1 | 0 | 0 |

|         |                                                             |          |          |   |   |   |   |   |   |   |   |
|---------|-------------------------------------------------------------|----------|----------|---|---|---|---|---|---|---|---|
| ESD     | S-formylglutathione hydrolase                               | 31442.46 | 4.699333 | 0 | 0 | 0 | 0 | 0 | 1 | 0 | 0 |
| PYGB    | Glycogen phosphorylase, brain form                          | 96634.52 | 5.000755 | 0 | 0 | 0 | 0 | 0 | 1 | 0 | 0 |
| G6PD    | Glucose-6-phosphate 1-dehydrogenase                         | 59218.99 | 4.922142 | 0 | 0 | 0 | 0 | 0 | 1 | 0 | 0 |
| HARS    | Histidyl-tRNA synthetase, cytoplasmic                       | 57374.22 | 4.819817 | 0 | 0 | 0 | 0 | 0 | 1 | 0 | 0 |
| COL6A2  | Collagen alpha-2(VI) chain                                  | 108511.9 | 5.85     | 0 | 0 | 0 | 0 | 1 | 0 | 0 | 0 |
| PIP     | Prolactin-inducible protein                                 | 16561.8  | 4.749107 | 0 | 0 | 0 | 0 | 0 | 1 | 0 | 0 |
| CEACAM1 | Carcinoembryonic antigen-related cell adhesion molecule 1   | 57524.71 | 4.461143 | 0 | 0 | 0 | 0 | 0 | 0 | 1 | 0 |
| TPT1    | Translationally-controlled tumor protein                    | 19582.58 | 4.329231 | 0 | 0 | 0 | 0 | 0 | 1 | 0 | 0 |
| ETFA    | Electron transfer flavoprotein subunit alpha, mitochondrial | 35057.58 | 8.62     | 1 | 0 | 0 | 0 | 0 | 0 | 0 | 0 |
| FDPS    | Farnesyl pyrophosphate synthetase                           | 48244.63 | 5.83     | 0 | 0 | 0 | 0 | 1 | 0 | 0 | 0 |
| SI      | Sucrase-isomaltase, intestinal                              | 209271   | 4.259483 | 0 | 0 | 0 | 0 | 0 | 1 | 0 | 0 |
| NID1    | Nidogen-1                                                   | 136366.8 | 4.441277 | 0 | 0 | 0 | 1 | 0 | 0 | 0 | 0 |
|         | Eukaryotic translation initiation factor 5A-1               |          |          |   |   |   |   |   |   |   |   |
|         | EIF5A                                                       |          | 16821.4  |   |   |   |   |   |   |   |   |
|         |                                                             |          |          | 0 | 1 | 0 | 0 | 0 | 0 | 0 | 0 |
| ANPEP   | Aminopeptidase N                                            | 109470.9 | 4.395988 | 0 | 0 | 0 | 0 | 0 | 1 | 0 | 0 |
|         | Peptidyl-prolyl cis-trans isomerase A                       |          |          |   |   |   |   |   |   |   |   |
|         | PPIA                                                        |          | 18000.88 |   |   |   |   |   |   |   |   |
|         |                                                             |          |          | 0 | 1 | 0 | 0 | 0 | 0 | 0 | 0 |
| UCHL3   | Ubiquitin carboxyl-terminal hydrolase isozyme L3            | 26165.97 | 4.542641 | 0 | 0 | 0 | 0 | 0 | 1 | 0 | 0 |
| CHRNA2  | Neuronal acetylcholine receptor subunit beta-2              | 56982.07 | 6.33     | 0 | 0 | 0 | 0 | 1 | 0 | 0 | 0 |



|        |                                                  |          |          |   |   |   |   |   |   |   |   |
|--------|--------------------------------------------------|----------|----------|---|---|---|---|---|---|---|---|
| IGFBP3 | Insulin-like growth factor-binding protein 3     | 31653.74 | 8.256371 | 0 | 0 | 0 | 0 | 0 | 1 | 0 | 0 |
| CCT1   | T-complex protein 1 subunit alpha                | 60305.58 | 5.151573 | 0 | 0 | 0 | 0 | 0 | 0 | 0 | 1 |
| ITIH1  | Inter-alpha-trypsin inhibitor heavy chain H1     | 101325.6 | 6.31     | 0 | 0 | 0 | 0 | 1 | 0 | 0 | 0 |
| TPSB2  | Tryptase beta-2                                  | 30495.47 | 5.157661 | 0 | 0 | 0 | 1 | 0 | 0 | 0 | 0 |
| LMNB1  | Lamin-B1                                         | 66367.62 | 4.773567 | 0 | 0 | 0 | 0 | 0 | 1 | 0 | 0 |
| PTMS   | Parathymosin                                     | 11523.19 | 4.13868  | 0 | 0 | 0 | 0 | 0 | 1 | 0 | 0 |
|        | Placental protein 11                             | 42093.97 | 4.295158 | 0 | 0 | 1 | 0 | 0 | 0 | 0 | 0 |
| ACO1   | Cytoplasmic aconitate hydratase                  | 98336.58 | 4.797386 | 0 | 0 | 1 | 0 | 0 | 0 | 0 | 0 |
| PAICS  | Multifunctional protein ADE2                     | 47049.14 | 5.494972 | 0 | 0 | 0 | 0 | 0 | 0 | 1 | 0 |
| UQCRC2 | Cytochrome b-c1 complex subunit 2, mitochondrial | 48412.88 | 8.74     | 1 | 0 | 0 | 0 | 0 | 0 | 0 | 0 |
| MRC1   | Macrophage mann e receptor 1                     | 165904.8 | 6.11     | 0 | 0 | 0 | 0 | 1 | 0 | 0 | 0 |
| ITGA6  | Integrin alpha-6                                 | 126553.2 | 4.799736 | 0 | 0 | 0 | 0 | 0 | 1 | 0 | 0 |
| RPS3   | 40S rib omal protein S3                          | 26671.43 | 9.68     | 1 | 0 | 0 | 0 | 0 | 0 | 0 | 0 |
| PRTN3  | Myeloblastin                                     | 27789.27 | 7.688026 | 0 | 0 | 0 | 1 | 0 | 0 | 0 | 0 |
| EEF1B2 | Elongation factor 1-beta                         | 24748.26 | 4.132271 | 0 | 0 | 0 | 0 | 0 | 1 | 0 | 0 |
|        | Extracellular superoxide dismutase [Cu-Zn]       |          |          |   |   |   |   |   |   |   |   |
|        | SOD3                                             |          | 25834.67 |   |   |   |   |   |   |   |   |
|        |                                                  |          |          | 0 | 1 | 0 | 0 | 0 | 0 | 0 | 0 |
| CTSS   | Cathepsin S                                      | 37471.3  | 5.214058 | 0 | 0 | 0 | 0 | 0 | 1 | 0 | 0 |
| S100P  | Protein S100-P                                   | 10393.22 | 4.491798 | 0 | 0 | 0 | 1 | 0 | 0 | 0 | 0 |
| U2AF2  | Splicing factor U2AF 65 kDa subunit              | 53467.19 | 6.535637 | 0 | 0 | 0 | 0 | 0 | 1 | 0 | 0 |
| GSTM2  | Glutathione S-transferase Mu 2                   | 25727.98 | 4.529076 | 0 | 0 | 0 | 0 | 0 | 1 | 0 | 0 |
| CRABP2 | Cellular retinoic acid-binding protein 2         | 15683.02 | 5.074883 | 0 | 0 | 1 | 0 | 0 | 0 | 0 | 0 |
|        | ERO1L                                            |          |          |   |   |   |   |   |   |   |   |
|        | ERO1-like                                        |          | 54358.05 | 0 | 1 | 0 | 0 | 0 | 0 | 0 | 0 |

|          |                                                                                      |                  |          |   |   |   |   |   |   |   |   |  |
|----------|--------------------------------------------------------------------------------------|------------------|----------|---|---|---|---|---|---|---|---|--|
|          |                                                                                      | protein<br>alpha |          |   |   |   |   |   |   |   |   |  |
| C21orf33 | ES1 protein homolog, mitochondrial                                                   | 28152.73         | 7.19445  | 0 | 0 | 0 | 0 | 0 | 1 | 0 | 0 |  |
| PPP2R1A  | Serine/threonine-protein phosphatase 2A 65<br>kDa regulatory subunit A alpha isoform | 65266.91         | 4.700401 | 0 | 0 | 1 | 0 | 0 | 0 | 0 | 0 |  |
| ADSL     | Adenylosuccinate lyase                                                               | 54853.97         | 5.609047 | 0 | 0 | 0 | 0 | 0 | 1 | 0 | 0 |  |
| GBP1     | Interferon-induced guanylate-binding protein<br>1                                    | 67859.68         | 5.057899 | 0 | 0 | 0 | 0 | 0 | 0 | 1 | 0 |  |
| GBP2     | Interferon-induced guanylate-binding protein<br>2                                    | 67140.38         | 5.54     | 0 | 0 | 0 | 0 | 1 | 0 | 0 | 0 |  |
| MAN1A1   | Mannosyl-oligosaccharide 1,2-alpha-<br>mannosidase IA                                | 72922.28         | 5.059608 | 0 | 0 | 1 | 0 | 0 | 0 | 0 | 0 |  |
| GPC1     | Glypican-1                                                                           | 61611.01         | 5.472008 | 0 | 0 | 1 | 0 | 0 | 0 | 0 | 0 |  |
| CTNNB1   | Catenin beta-1                                                                       | 85442.21         | 4.920219 | 0 | 0 | 0 | 0 | 0 | 1 | 0 | 0 |  |
| PHB      | Prohibitin                                                                           | 29785.9          | 5.57     | 1 | 0 | 0 | 0 | 0 | 0 | 0 | 0 |  |
| SERPINB6 | Serpin B6                                                                            | 42594.06         | 4.768761 | 0 | 0 | 0 | 0 | 0 | 1 | 0 | 0 |  |
| FBN1     | Fibrillin-1                                                                          | 312097.5         | 4.81     | 0 | 0 | 0 | 0 | 1 | 0 | 0 | 0 |  |
| COPB2    | Coatomer subunit beta'                                                               | 102422.5         | 4.557701 | 0 | 0 | 0 | 0 | 0 | 1 | 0 | 0 |  |
| ACTN2    | Alpha-actinin-2                                                                      | 103788.3         | 5.31     | 1 | 0 | 0 | 0 | 0 | 0 | 0 | 0 |  |
| KRT20    | Keratin, type I cytoskeletal 20                                                      | 48456.92         | 4.873863 | 0 | 0 | 0 | 1 | 0 | 0 | 0 | 0 |  |
|          | Interleuki<br>n-1<br>family<br>member<br>6                                           | 17673.01         |          |   |   |   |   |   |   |   |   |  |
|          | IL1F6                                                                                |                  |          | 0 | 1 | 0 | 0 | 0 | 0 | 0 | 0 |  |
| CPOX     | Coproporphyrinogen III oxidase,<br>mitochondrial                                     | 50119.97         | 6.544182 | 0 | 0 | 0 | 0 | 0 | 0 | 0 | 1 |  |
| PPP1CC   | Serine/threonine-protein phosphatase PP1-<br>gamma catalytic subunit                 | 36959.72         | 4.835625 | 0 | 0 | 0 | 0 | 0 | 0 | 0 | 1 |  |
| SRP14    | Signal recognition particle 14 kDa protein                                           | 14560.82         | 9.927116 | 0 | 0 | 1 | 0 | 0 | 0 | 0 | 0 |  |
| ATP6V1A  | V-type proton ATPase catalytic subunit A                                             | 68260.49         | 4.510597 | 0 | 0 | 0 | 0 | 0 | 1 | 0 | 0 |  |

|        |                                                     |                                                     |          |   |   |   |   |   |   |   |   |
|--------|-----------------------------------------------------|-----------------------------------------------------|----------|---|---|---|---|---|---|---|---|
|        | LYZ                                                 | Lysozyme C                                          | 16526.28 | 0 | 1 | 0 | 0 | 0 | 0 | 0 | 0 |
| MMP12  | Macrophage metalloelastase                          | 53967.14                                            | 5.133842 | 0 | 0 | 0 | 0 | 0 | 0 | 1 | 0 |
| PSMB10 | Proteasome subunit beta type-10                     | 28918.07                                            | 5.986626 | 0 | 0 | 0 | 0 | 0 | 0 | 1 | 0 |
| PRCP   | Lysosomal Pro-X carboxypeptidase                    | 55763.92                                            | 6.76     | 0 | 0 | 0 | 0 | 1 | 0 | 0 | 0 |
| CXCL5  | C-X-C motif chemokine 5                             | 11964.51                                            | 9.167473 | 0 | 0 | 0 | 1 | 0 | 0 | 0 | 0 |
| MCAM   | Cell surface glycoprotein MUC18                     | 71562.6                                             | 5.58     | 0 | 0 | 0 | 0 | 1 | 0 | 0 | 0 |
| VDAC2  | Voltage-dependent anion-selective channel protein 2 | 31546.55                                            | 7.5      | 1 | 0 | 0 | 0 | 0 | 0 | 0 | 0 |
| PSMD8  | 26S proteasome non-ATPase regulatory subunit 8      | 29985.62                                            | 6.85     | 1 | 0 | 0 | 0 | 0 | 0 | 0 | 0 |
|        | PITPNA                                              | Phosphatidylinositol transfer protein alpha isoform | 31786.02 | 0 | 1 | 0 | 0 | 0 | 0 | 0 | 0 |
| IDH2   | Isocitrate dehydrogenase [NADP], mitochondrial      | 50876.86                                            | 8.88     | 1 | 0 | 0 | 0 | 0 | 0 | 0 | 0 |
| PITPNB | Phosphatidylinositol transfer protein beta isoform  | 31519.91                                            | 5.106178 | 0 | 0 | 0 | 0 | 0 | 1 | 0 | 0 |
|        | ABHD8                                               | Abhydrolase domain-containing protein 8             | 47301.09 | 0 | 1 | 0 | 0 | 0 | 0 | 0 | 0 |
|        | RSU1                                                | Ras suppressor protein 1                            | 31520.69 | 0 | 1 | 0 | 0 | 0 | 0 | 0 | 0 |
| AARS   | Alanyl-tRNA synthetase, cytoplasmic                 | 106743.2                                            | 4.737999 | 0 | 0 | 0 | 0 | 0 | 1 | 0 | 0 |

|         |                                                   |                                                                     |          |   |   |   |   |   |   |   |   |
|---------|---------------------------------------------------|---------------------------------------------------------------------|----------|---|---|---|---|---|---|---|---|
| CARS    | CysteinyI-tRNA synthetase, cytoplasmic            | 85419.23                                                            | 5.182976 | 0 | 0 | 0 | 0 | 0 | 1 | 0 | 0 |
|         | UGP2                                              | UTP--<br>glucose-<br>1-<br>phosphat<br>e<br>uridylyltr<br>ansferase | 56904.72 |   | 0 | 1 | 0 | 0 | 0 | 0 | 0 |
| HINT1   | Histidine triad nucleotide-binding protein 1      | 13793.09                                                            | 6.017174 | 0 | 0 | 0 | 0 | 0 | 1 | 0 | 0 |
| NUP153  | Nuclear pore complex protein Nup153               | 153843.2                                                            | 8.97     | 1 | 0 | 0 | 0 | 0 | 0 | 0 | 0 |
| KLK7    | Kallikrein-7                                      | 27506.81                                                            | 8.249855 | 0 | 0 | 1 | 0 | 0 | 0 | 0 | 0 |
| CAMP    | Cathelicidin antimicrobial peptide                | 19289.16                                                            | 9.273109 | 0 | 0 | 1 | 0 | 0 | 0 | 0 | 0 |
|         | Uncharac<br>terized<br>protein<br>FLJ3965<br>3    | 29535.18                                                            |          |   | 0 | 1 | 0 | 0 | 0 | 0 | 0 |
| CCT4    | T-complex protein 1 subunit delta                 | 57887.76                                                            | 6.01226  | 0 | 0 | 1 | 0 | 0 | 0 | 0 | 0 |
| DUSP3   | Dual specificity protein phosphatase 3            | 20465.31                                                            | 4.938591 | 0 | 0 | 1 | 0 | 0 | 0 | 0 | 0 |
| HSD17B4 | Peroxisomal multifunctional enzyme type 2         | 79636.3                                                             | 5.980751 | 0 | 0 | 0 | 0 | 0 | 1 | 0 | 0 |
| HNRNPF  | Heterogeneous nuclear ribonucleoprotein F         | 45642.85                                                            | 4.415855 | 0 | 0 | 0 | 0 | 0 | 1 | 0 | 0 |
| ZNF132  | Zinc finger protein 132                           | 80570.98                                                            | 8.77     | 0 | 0 | 0 | 0 | 1 | 0 | 0 | 0 |
| SMS     | Spermine synthase                                 | 41241.78                                                            | 4.194221 | 0 | 0 | 0 | 0 | 0 | 1 | 0 | 0 |
| PPP5C   | Serine/threonine-protein phosphatase 5            | 56842.25                                                            | 4.598717 | 0 | 0 | 0 | 0 | 0 | 1 | 0 | 0 |
| RABGGTB | Geranylgeranyl transferase type-2 subunit<br>beta | 36900.31                                                            | 4.371849 | 0 | 0 | 0 | 0 | 0 | 1 | 0 | 0 |
| COPA    | Coatomer subunit alpha                            | 138257.9                                                            | 7.7      | 1 | 0 | 0 | 0 | 0 | 0 | 0 | 0 |
| SEC24C  | Protein transport protein Sec24C                  | 118239.1                                                            | 4.578636 | 0 | 0 | 0 | 0 | 0 | 1 | 0 | 0 |
|         | ALDH2                                             | Aldehyde<br>dehydrog<br>enase,                                      | 56345.62 |   | 0 | 1 | 0 | 0 | 0 | 0 | 0 |

|          |                                                                        |          |          |   |   |   |   |   |   |   |   |   |
|----------|------------------------------------------------------------------------|----------|----------|---|---|---|---|---|---|---|---|---|
|          |                                                                        | mitochon | drial    |   |   |   |   |   |   |   |   |   |
| HSPA2    | Heat shock-related 70 kDa protein 2                                    | 69977.86 | 4.87632  | 0 | 0 | 1 | 0 | 0 | 0 | 0 | 0 | 0 |
| NAPA     | Alpha-soluble NSF attachment protein                                   | 33211.28 | 4.48037  | 0 | 0 | 1 | 0 | 0 | 0 | 0 | 0 | 0 |
| PLTP     | Phospholipid transfer protein                                          | 54704.54 | 5.164818 | 0 | 0 | 0 | 0 | 0 | 1 | 0 | 0 | 0 |
| SEC13    | Protein SEC13 homolog                                                  | 35518.11 | 5.22     | 0 | 0 | 0 | 0 | 1 | 0 | 0 | 0 | 0 |
| EPPK1    | Epiplakin                                                              | 552753.7 | 4.858589 | 0 | 0 | 0 | 0 | 0 | 0 | 1 | 0 | 0 |
| MTPN     | Myotrophin                                                             | 12886.61 | 4.791084 | 0 | 0 | 0 | 1 | 0 | 0 | 0 | 0 | 0 |
| HIST1H2B |                                                                        |          |          |   |   |   |   |   |   |   |   |   |
| D        | Histone H2B type 1-D                                                   | 13927.57 | 10.31    | 0 | 0 | 0 | 0 | 1 | 0 | 0 | 0 | 0 |
| UBE2D3   | Ubiquitin-conjugating enzyme E2 D3                                     | 16676.37 | 4.915413 | 0 | 0 | 0 | 0 | 0 | 0 | 1 | 0 | 0 |
| HSPE1    | 10 kDa heat shock protein, mitochondrial                               | 10924.87 | 5.374702 | 0 | 0 | 0 | 0 | 0 | 1 | 0 | 0 | 0 |
| HNRNPK   | Heterogeneous nuclear ribonucleoprotein K                              | 50944.4  | 4.595406 | 0 | 0 | 0 | 0 | 0 | 1 | 0 | 0 | 0 |
| PSMC6    | 26S protease regulatory subunit S10B                                   | 44145.1  | 7.09     | 1 | 0 | 0 | 0 | 0 | 0 | 0 | 0 | 0 |
| RPL7A    | 60S ribosomal protein L7a                                              | 29977.02 | 10.61    | 1 | 0 | 0 | 0 | 0 | 0 | 0 | 0 | 0 |
| LCN6     | Epididymal-specific lipocalin-6                                        | 18033.26 | 4.84     | 0 | 0 | 0 | 0 | 1 | 0 | 0 | 0 | 0 |
| ESRRG    | Estrogen-related receptor gamma                                        | 51272.63 | 4.85891  | 0 | 0 | 0 | 1 | 0 | 0 | 0 | 0 | 0 |
| PPP2CB   | Serine/threonine-protein phosphatase 2A catalytic subunit beta isoform | 35552.33 | 4.343544 | 0 | 0 | 0 | 0 | 0 | 1 | 0 | 0 | 0 |
| RAN      | GTP-binding nuclear protein Ran                                        | 24407.62 | 5.193977 | 0 | 0 | 0 | 0 | 0 | 1 | 0 | 0 | 0 |
| RPL30    | 60S ribosomal protein L30                                              | 12775.74 | 8.806984 | 0 | 0 | 1 | 0 | 0 | 0 | 0 | 0 | 0 |
| RPL11    | 60S ribosomal protein L11                                              | 20239.64 | 9.095161 | 0 | 0 | 0 | 1 | 0 | 0 | 0 | 0 | 0 |
| GRB2     | Growth factor receptor-bound protein 2                                 | 25190.43 | 4.940514 | 0 | 0 | 0 | 0 | 0 | 1 | 0 | 0 | 0 |
| UBE2I    | SUMO-conjugating enzyme UBC9                                           | 17995.2  | 6.124199 | 0 | 0 | 0 | 1 | 0 | 0 | 0 | 0 | 0 |
| TUBA4A   | Tubulin alpha-4A chain                                                 | 49892.37 | 4.338951 | 0 | 0 | 0 | 1 | 0 | 0 | 0 | 0 | 0 |
| PAFAH1B2 | Platelet-activating factor acetylhydrolase IB subunit beta             | 25553.12 | 5.57     | 0 | 0 | 0 | 0 | 1 | 0 | 0 | 0 | 0 |
| PSPH     | Phosphoserine phosphatase                                              | 24991.9  | 5.53     | 0 | 0 | 0 | 0 | 1 | 0 | 0 | 0 | 0 |
| KRT83    | Keratin, type II cuticular Hb3                                         | 54160.51 | 4.868629 | 0 | 0 | 0 | 1 | 0 | 0 | 0 | 0 | 0 |
| RELN     | Reelin                                                                 | 388166.5 | 4.550545 | 0 | 0 | 0 | 1 | 0 | 0 | 0 | 0 | 0 |

|        |                                                            |          |          |   |   |   |   |   |   |   |   |
|--------|------------------------------------------------------------|----------|----------|---|---|---|---|---|---|---|---|
| PRKDC  | DNA-dependent protein kinase catalytic subunit             | 468787.9 | 6.75     | 1 | 0 | 0 | 0 | 0 | 0 | 0 | 0 |
| LRP2   | Low-density lipoprotein receptor-related protein 2         | 521615.6 | 4.89     | 1 | 0 | 0 | 0 | 0 | 0 | 0 | 0 |
| SORD   | Sorbitol dehydrogenase                                     | 38271.84 | 6.0756   | 0 | 0 | 0 | 0 | 0 | 1 | 0 | 0 |
| SET    | Protein SET                                                | 33468.7  | 4.079399 | 0 | 0 | 0 | 0 | 0 | 1 | 0 | 0 |
| FKBP4  | FK506-binding protein 4                                    | 51772.07 | 4.762566 | 0 | 0 | 0 | 0 | 0 | 1 | 0 | 0 |
| MUC2   | Mucin-2                                                    | 539958.3 | 4.579277 | 0 | 0 | 0 | 0 | 0 | 0 | 1 | 0 |
| NUCB1  | Nucleobindin-1                                             | 53846.33 | 4.922142 | 0 | 0 | 1 | 0 | 0 | 0 | 0 | 0 |
| ACY1   | Aminoacylase-1                                             | 45855.99 | 5.77     | 0 | 0 | 0 | 0 | 1 | 0 | 0 | 0 |
| LMNB2  | Lamin-B2                                                   | 67647.49 | 4.970421 | 0 | 0 | 0 | 0 | 0 | 1 | 0 | 0 |
|        | Mannose-6-phosphate receptor-binding protein 1             |          |          |   |   |   |   |   |   |   |   |
|        | M6PRBP1                                                    | 47017.91 |          |   |   |   |   |   |   |   |   |
|        |                                                            |          |          | 0 | 1 | 0 | 0 | 0 | 0 | 0 | 0 |
| GBE1   | 1,4-alpha-glucan-branching enzyme                          | 80408.62 | 4.467552 | 0 | 0 | 0 | 0 | 0 | 1 | 0 | 0 |
| AKR1C1 | Aldo-keto reductase family 1 member C1                     | 36765.02 | 5.160545 | 0 | 0 | 0 | 0 | 0 | 1 | 0 | 0 |
| LRP1   | Prolow-density lipoprotein receptor-related protein 1      | 504244.8 | 4.599037 | 0 | 0 | 0 | 0 | 0 | 1 | 0 | 0 |
| AP1B1  | AP-1 complex subunit beta-1                                | 104540.1 | 4.455162 | 0 | 0 | 0 | 0 | 0 | 1 | 0 | 0 |
| TWF1   | Twinfilin-1                                                | 42182.55 | 5.043373 | 0 | 0 | 0 | 0 | 0 | 1 | 0 | 0 |
| EFEMP1 | EGF-containing fibulin-like extracellular matrix protein 1 | 54604.23 | 4.15139  | 0 | 0 | 0 | 0 | 0 | 1 | 0 | 0 |
| BPTF   | Nucleosome-remodeling factor subunit BPTF                  | 338053.6 | 5.329308 | 0 | 0 | 0 | 0 | 0 | 1 | 0 | 0 |
| LMAN2  | Vesicular integral-membrane protein VIP36                  | 40203.1  | 5.32621  | 0 | 0 | 0 | 1 | 0 | 0 | 0 | 0 |
| EPS8   | Epidermal growth factor receptor kinase substrate 8        | 91824.42 | 5.564186 | 0 | 0 | 0 | 0 | 0 | 0 | 1 | 0 |
| GOLGA4 | Golgin subfamily A member 4                                | 260979.7 | 5.102974 | 0 | 0 | 0 | 1 | 0 | 0 | 0 | 0 |

|            |                                                                     |            |          |   |   |   |   |   |   |   |   |
|------------|---------------------------------------------------------------------|------------|----------|---|---|---|---|---|---|---|---|
| COTL1      | Coactosin-like protein                                              | 15935.03   | 4.850365 | 0 | 0 | 0 | 0 | 0 | 0 | 1 | 0 |
| LY6D       | Lymphocyte antigen 6D                                               | 13277.71   | 8.380806 | 0 | 0 | 0 | 0 | 0 | 0 | 1 | 0 |
| SPARCL1    | SPARC-like protein 1                                                | 75169.2    | 4.510704 | 0 | 0 | 1 | 0 | 0 | 0 | 0 | 0 |
| MESDC2     | Mesoderm development candidate 2                                    | 26060.3    | 5.50074  | 0 | 0 | 0 | 0 | 0 | 1 | 0 | 0 |
| KRT72      | Keratin, type II cytoskeletal 72                                    | 55842.44   | 5.077766 | 0 | 0 | 0 | 1 | 0 | 0 | 0 | 0 |
| PSMD6      | 26S proteasome non-ATPase regulatory subunit 6                      | 45502.27   | 4.482719 | 0 | 0 | 0 | 1 | 0 | 0 | 0 | 0 |
|            | SDC4                                                                | Syndecan-4 | 21628.03 | 0 | 1 | 0 | 0 | 0 | 0 | 0 | 0 |
| PPA1       | Inorganic pyrophosphatase                                           | 32639.15   | 4.746864 | 0 | 0 | 0 | 0 | 0 | 1 | 0 | 0 |
| PPP1R7     | Protein phosphatase 1 regulatory subunit 7                          | 41538.53   | 4.680107 | 0 | 0 | 0 | 0 | 0 | 1 | 0 | 0 |
| SEC23A     | Protein transport protein Sec23A                                    | 86105.25   | 4.985588 | 0 | 0 | 0 | 0 | 0 | 1 | 0 | 0 |
| SURF1      | Surfeit locus protein 1                                             | 33310.39   | 9.64     | 0 | 0 | 0 | 0 | 1 | 0 | 0 | 0 |
| GRK1       | Rhodopsin kinase                                                    | 63485.11   | 5.63     | 1 | 0 | 0 | 0 | 0 | 0 | 0 | 0 |
| SYPL1      | Synaptophysin-like protein 1                                        | 28546.7    | 8.69     | 1 | 0 | 0 | 0 | 0 | 0 | 0 | 0 |
| PCK2       | Phosphoenolpyruvate carboxykinase [GTP], mitochondrial              | 70591.61   | 5.966652 | 0 | 0 | 0 | 0 | 0 | 1 | 0 | 0 |
| TXNRD1     | Thioredoxin reductase 1, cytoplasmic                                | 70824.35   | 5.051277 | 0 | 0 | 0 | 0 | 0 | 1 | 0 | 0 |
| IMMT       | Mitochondrial inner membrane protein                                | 83626.35   | 6.08     | 1 | 0 | 0 | 0 | 0 | 0 | 0 | 0 |
| CSPP1      | Centr ome and spindle pole-associated protein 1                     | 141663.6   | 6.26     | 0 | 0 | 0 | 0 | 1 | 0 | 0 | 0 |
| TP53I3     | Putative quinone oxidoreductase                                     | 35513.58   | 5.059181 | 0 | 0 | 0 | 0 | 0 | 0 | 0 | 1 |
| ACTBL2     | Beta-actin-like protein 2                                           | 41975.97   | 5.39     | 0 | 0 | 0 | 0 | 1 | 0 | 0 | 0 |
| HSP90AA4 P | Putative heat shock protein HSP 90-alpha A4                         | 47682.12   | 4.628304 | 0 | 0 | 0 | 0 | 0 | 1 | 0 | 0 |
| GNAS       | Guanine nucleotide-binding protein G(s) subunit alpha isoforms XLas | 110955.5   | 4.91     | 1 | 0 | 0 | 0 | 0 | 0 | 0 | 0 |
| SNAP47     | Synaptosomal-associated protein 47                                  | 47268.46   | 6.081047 | 0 | 0 | 0 | 0 | 0 | 1 | 0 | 0 |
| MUC21      | Mucin-21                                                            | 54168.4    | 4.8      | 1 | 0 | 0 | 0 | 0 | 0 | 0 | 0 |
| C10orf81   | PH domain-containing protein C10orf81                               | 51806.53   | 5.55     | 0 | 0 | 0 | 0 | 1 | 0 | 0 | 0 |

|          |                                                                     |                                              |          |   |   |   |   |   |   |   |   |
|----------|---------------------------------------------------------------------|----------------------------------------------|----------|---|---|---|---|---|---|---|---|
| C9orf104 | Uncharacterized protein C9orf104                                    | 6583.58                                      | 10.35    | 1 | 0 | 0 | 0 | 0 | 0 | 0 | 0 |
| ANXA8L1  | Annexin A8-like protein 1                                           | 36857.61                                     | 5.45     | 0 | 0 | 0 | 0 | 1 | 0 | 0 | 0 |
| CROCC    | Rootletin                                                           | 228387.6                                     | 5.45     | 1 | 0 | 0 | 0 | 0 | 0 | 0 | 0 |
| BROX     | BRO1 domain-containing protein BROX                                 | 46446.65                                     | 4.9748   | 0 | 0 | 0 | 0 | 0 | 1 | 0 | 0 |
| C1QL3    | Complement C1q-like protein 3                                       | 26702.18                                     | 4.416283 | 0 | 0 | 1 | 0 | 0 | 0 | 0 | 0 |
| KRT40    | Keratin, type I cytoskeletal 40                                     | 48107.6                                      | 4.126289 | 0 | 0 | 1 | 0 | 0 | 0 | 0 | 0 |
| CYB5R2   | NADH-cytochrome b5 reductase 2                                      | 31438.37                                     | 5.450111 | 0 | 0 | 0 | 0 | 0 | 1 | 0 | 0 |
| TWF2     | Twinfilin-2                                                         | 39523.27                                     | 5.257957 | 0 | 0 | 0 | 1 | 0 | 0 | 0 | 0 |
| HIBCH    | 3-hydroxyisobutyryl-CoA hydrolase, mitochondrial                    | 43454.4                                      | 6.155388 | 0 | 0 | 0 | 0 | 0 | 1 | 0 | 0 |
| TATDN1   | Putative deoxyribonuclease TATDN1                                   | 33579.93                                     | 5.622292 | 0 | 0 | 0 | 0 | 0 | 0 | 1 | 0 |
| FAHD1    | Fumarylacetoacetate hydrolase domain-containing protein 1           | 24826.73                                     | 5.163216 | 0 | 0 | 0 | 0 | 0 | 1 | 0 | 0 |
| ATAD2    | ATPase family AAA domain-containing protein 2                       | 158456.1                                     | 5.146446 | 0 | 0 | 0 | 0 | 0 | 1 | 0 | 0 |
| MICALCL  | MICAL C-terminal-like protein                                       | 77520.97                                     | 8.64     | 0 | 0 | 0 | 0 | 1 | 0 | 0 | 0 |
|          | Uncharacterized protein LOC339524                                   | 28676.08                                     | 11.70297 | 0 | 0 | 0 | 0 | 0 | 0 | 0 | 1 |
| HIST2H3A | Histone H3.2                                                        | 15378.51                                     | 11.24709 | 0 | 0 | 0 | 0 | 0 | 0 | 1 | 0 |
| SSH2     | Protein phosphatase Slingshot homolog 2                             | 158116.5                                     | 4.9011   | 0 | 0 | 0 | 1 | 0 | 0 | 0 | 0 |
| GDPD3    | Glycerophosphodiester phosphodiesterase domain-containing protein 3 | 29605.11                                     | 5.300362 | 0 | 0 | 0 | 1 | 0 | 0 | 0 | 0 |
| GSTA5    | Glutathione S-transferase A5                                        | 25705.6                                      | 7.74     | 1 | 0 | 0 | 0 | 0 | 0 | 0 | 0 |
|          |                                                                     | 3,2-trans-enoyl-CoA isomerase, mitochondrial | 32795.24 | 0 | 1 | 0 | 0 | 0 | 0 | 0 | 0 |
|          | DCI                                                                 |                                              |          |   |   |   |   |   |   |   |   |
| GALNT5   | Polypeptide N-acetylgalactosaminyltransferase 5                     | 106199.4                                     | 9.150383 | 0 | 0 | 0 | 0 | 0 | 1 | 0 | 0 |



|          |                                                           |          |          |   |   |   |   |   |   |   |   |
|----------|-----------------------------------------------------------|----------|----------|---|---|---|---|---|---|---|---|
| RALYL    | RNA-binding Raly-like protein                             | 32310.56 | 7.69     | 1 | 0 | 0 | 0 | 0 | 0 | 0 | 0 |
| ALPK2    | Alpha-protein kinase 2                                    | 210038.6 | 4.820671 | 0 | 0 | 0 | 1 | 0 | 0 | 0 | 0 |
| KTN1     | Kinectin                                                  | 156179.3 | 5.272377 | 0 | 0 | 0 | 1 | 0 | 0 | 0 | 0 |
| CD163    | Scavenger receptor cysteine-rich type 1 protein M130      | 125355.2 | 5.35537  | 0 | 0 | 1 | 0 | 0 | 0 | 0 | 0 |
| DHX40    | Probable ATP-dependent RNA helicase DHX40                 | 88503.75 | 7.261101 | 0 | 0 | 0 | 0 | 0 | 1 | 0 | 0 |
| FAM186B  | Protein FAM186B                                           | 103656.6 | 6.78376  | 0 | 0 | 0 | 0 | 0 | 1 | 0 | 0 |
| TMEFF1   | Tomoregulin-1                                             | 40907.08 | 4.946709 | 0 | 0 | 0 | 0 | 0 | 0 | 1 | 0 |
| ALDH16A1 | Aldehyde dehydrogenase family 16 member A1                | 85059.68 | 5.455452 | 0 | 0 | 0 | 0 | 0 | 1 | 0 | 0 |
| DOCK4    | Dedicator of cytokinesis protein 4                        | 225004.9 | 7.69     | 0 | 0 | 0 | 0 | 1 | 0 | 0 | 0 |
|          | Elongation factor Tu, mitochondrial                       |          |          | 0 | 1 | 0 | 0 | 0 | 0 | 0 | 0 |
|          | TUFM                                                      | 49510.18 |          |   |   |   |   |   |   |   |   |
| WDR31    | WD repeat-containing protein 31                           | 40813.42 | 8.65     | 0 | 0 | 0 | 0 | 1 | 0 | 0 | 0 |
| C17orf76 | Leucine-rich repeat-containing protein C17orf76           | 37756.66 | 6.37542  | 0 | 0 | 0 | 0 | 0 | 1 | 0 | 0 |
| APOA1BP  | Apolipoprotein A-I-binding protein                        | 31654.24 | 4.661308 | 0 | 0 | 0 | 0 | 0 | 1 | 0 | 0 |
| BVES     | Blood vessel epicardial substance                         | 41424.13 | 5.672493 | 0 | 0 | 0 | 1 | 0 | 0 | 0 | 0 |
| MFSD8    | Major facilitator superfamily domain-containing protein 8 | 57590.17 | 6.41     | 0 | 0 | 0 | 0 | 1 | 0 | 0 | 0 |
| ACTL7C   | Actin-like protein 7C                                     | 45538.47 | 5.221321 | 0 | 0 | 0 | 0 | 0 | 0 | 1 | 0 |
| NT5C     | 5'(3')-deoxyribonucleotidase, cytosolic type              | 23368.07 | 5.532249 | 0 | 0 | 0 | 0 | 0 | 1 | 0 | 0 |
| BICD2    | Protein bicaudal D homolog 2                              | 93476.03 | 4.927696 | 0 | 0 | 0 | 1 | 0 | 0 | 0 | 0 |
| DSCAML1  | Down syndrome cell adhesion molecule-like protein 1       | 224322.8 | 5.312325 | 0 | 0 | 0 | 0 | 0 | 0 | 1 | 0 |
| ABCA5    | ATP-binding cassette sub-family A member 5                | 186386.8 | 4.797493 | 0 | 0 | 0 | 0 | 0 | 0 | 0 | 1 |
| TTN      | Titin                                                     | 3813810  | 6.01     | 1 | 0 | 0 | 0 | 0 | 0 | 0 | 0 |

|          |                                                              |          |          |   |   |   |   |   |   |   |   |
|----------|--------------------------------------------------------------|----------|----------|---|---|---|---|---|---|---|---|
| DDB2     | DNA damage-binding protein 2                                 | 47833.38 | 9.095695 | 0 | 0 | 0 | 0 | 0 | 1 | 0 | 0 |
| FAM3C    | Protein FAM3C                                                | 24664.58 | 5.769478 | 0 | 0 | 0 | 0 | 0 | 1 | 0 | 0 |
| NDRG1    | Protein NDRG1                                                | 42807.72 | 4.820457 | 0 | 0 | 0 | 0 | 0 | 1 | 0 | 0 |
| PXDN     | Peroxidasin homolog                                          | 165169.9 | 5.495079 | 0 | 0 | 0 | 0 | 0 | 1 | 0 | 0 |
| KRT35    | Keratin, type I cuticular Ha5                                | 50323.49 | 4.483147 | 0 | 0 | 0 | 1 | 0 | 0 | 0 | 0 |
| GOLGA1   | Golgin subfamily A member 1                                  | 88146.15 | 5.11483  | 0 | 0 | 0 | 0 | 0 | 1 | 0 | 0 |
| UFD1L    | Ubiquitin fusion degradation protein 1 homolog               | 34478.31 | 5.039314 | 0 | 0 | 0 | 0 | 0 | 1 | 0 | 0 |
| USP7     | Ubiquitin carboxyl-terminal hydrolase 7                      | 128220.3 | 4.682884 | 0 | 0 | 0 | 0 | 0 | 0 | 1 | 0 |
| C19orf10 | UPF0556 protein C19orf10                                     | 18783.31 | 5.00428  | 0 | 0 | 0 | 0 | 0 | 1 | 0 | 0 |
| ISOC2    | Isochorismatase domain-containing protein 2, mitochondrial   | 22322.84 | 6.413658 | 0 | 0 | 0 | 0 | 0 | 1 | 0 | 0 |
| TMIGD2   | Transmembrane and immunoglobulin domain-containing protein 2 | 30655.43 | 9.13     | 1 | 0 | 0 | 0 | 0 | 0 | 0 | 0 |
| FAM3D    | Protein FAM3D                                                | 24946.77 | 9.42     | 1 | 0 | 0 | 0 | 0 | 0 | 0 | 0 |
| EFHD2    | EF-hand domain-containing protein D2                         | 26680.46 | 5.15     | 0 | 0 | 0 | 0 | 1 | 0 | 0 | 0 |
| GALM     | Aldose 1-epimerase                                           | 37742.13 | 5.015388 | 0 | 0 | 0 | 0 | 0 | 1 | 0 | 0 |
| INTS12   | Integrator complex subunit 12                                | 48777.13 | 9.651543 | 0 | 0 | 0 | 0 | 0 | 0 | 0 | 1 |
| S100A16  | Protein S100-A16                                             | 11793.97 | 6.28     | 1 | 0 | 0 | 0 | 0 | 0 | 0 | 0 |
| OTUB1    | Ubiquitin thioesterase OTUB1                                 | 31264.42 | 4.216972 | 0 | 0 | 0 | 0 | 0 | 1 | 0 | 0 |
| DCUN1D1  | DCN1-like protein 1                                          | 30105.05 | 4.716743 | 0 | 0 | 0 | 0 | 0 | 1 | 0 | 0 |
| AKR1CL2  | Aldo-keto reductase family 1 member C-like protein 2         | 36551.65 | 6.89     | 0 | 0 | 0 | 0 | 1 | 0 | 0 | 0 |
| TEKT5    | Tektin-5                                                     | 56258.24 | 5.539619 | 0 | 0 | 0 | 1 | 0 | 0 | 0 | 0 |
| PVRL4    | Poliovirus receptor-related protein 4                        | 55419.78 | 4.819817 | 0 | 0 | 1 | 0 | 0 | 0 | 0 | 0 |
| IPO9     | Importin-9                                                   | 115888.7 | 4.397484 | 0 | 0 | 0 | 0 | 0 | 1 | 0 | 0 |
| KRT12    | Keratin, type I cytoskeletal 12                              | 53478.44 | 4.394814 | 0 | 0 | 0 | 1 | 0 | 0 | 0 | 0 |
| CORO1B   | Coronin-1B                                                   | 54200.25 | 4.973305 | 0 | 0 | 0 | 0 | 0 | 1 | 0 | 0 |
| TXNDC17  | Thioredoxin domain-containing protein 17                     | 13931.8  | 4.6847   | 0 | 0 | 1 | 0 | 0 | 0 | 0 | 0 |
| CSTP1    | Uncharacterized metallophosphoesterase                       | 35553.88 | 4.994667 | 0 | 0 | 0 | 0 | 0 | 1 | 0 | 0 |

|          |                                                                                 |            |          |   |   |   |   |   |   |   |   |
|----------|---------------------------------------------------------------------------------|------------|----------|---|---|---|---|---|---|---|---|
|          | CSTP1                                                                           |            |          |   |   |   |   |   |   |   |   |
| LXN      | Latexin                                                                         | 25733.89   | 4.622749 | 0 | 0 | 0 | 0 | 0 | 1 | 0 | 0 |
| COPS4    | COP9 signalosome complex subunit 4                                              | 46239.67   | 4.697731 | 0 | 0 | 0 | 0 | 0 | 1 | 0 | 0 |
| TMEM109  | Transmembrane protein 109                                                       | 26193.58   | 10.48    | 1 | 0 | 0 | 0 | 0 | 0 | 0 | 0 |
| CARD11   | Caspase recruitment domain-containing protein 11                                | 133200.3   | 5.039207 | 0 | 0 | 0 | 0 | 0 | 1 | 0 | 0 |
| CAPS2    | Calcyphosin-2                                                                   | 63795.55   | 5.960457 | 0 | 0 | 0 | 1 | 0 | 0 | 0 | 0 |
| MRPL13   | 39S ribosomal protein L13, mitochondrial                                        | 20678.68   | 9.18     | 1 | 0 | 0 | 0 | 0 | 0 | 0 | 0 |
| NLN      | Neurolysin, mitochondrial                                                       | 80599.69   | 4.829857 | 0 | 0 | 0 | 0 | 0 | 1 | 0 | 0 |
| PRSS22   | Brain-specific serine protease 4                                                | 33710.1    | 6.12249  | 0 | 0 | 0 | 0 | 0 | 1 | 0 | 0 |
| WNT10A   | Protein Wnt-10a                                                                 | 46414.11   | 9.38     | 1 | 0 | 0 | 0 | 0 | 0 | 0 | 0 |
| C11orf54 | Ester hydrolase C11orf54                                                        | 35094.61   | 5.189705 | 0 | 0 | 0 | 0 | 0 | 1 | 0 | 0 |
|          | SDC1                                                                            | Syndecan-1 | 32456.83 | 0 | 1 | 0 | 0 | 0 | 0 | 0 | 0 |
| SH3BGRL3 | SH3 domain-binding glutamic acid-rich-like protein 3                            | 10431.26   | 4.82     | 0 | 0 | 0 | 0 | 1 | 0 | 0 | 0 |
| ACBD3    | Golgi resident protein GCP60                                                    | 60555.98   | 5.02     | 0 | 0 | 0 | 0 | 1 | 0 | 0 | 0 |
| PTPN23   | Tyrosine-protein phosphatase non-receptor type 23                               | 178861     | 6.45     | 1 | 0 | 0 | 0 | 0 | 0 | 0 | 0 |
| EPB41L1  | Band 4.1-like protein 1                                                         | 98442.17   | 4.931969 | 0 | 0 | 0 | 0 | 0 | 0 | 1 | 0 |
| PPP1R3E  | Protein phosphatase 1 regulatory subunit 3E                                     | 30624.96   | 11.16    | 0 | 0 | 0 | 0 | 1 | 0 | 0 | 0 |
| EPB41L4A | Band 4.1-like protein 4A                                                        | 69332.01   | 6.593956 | 0 | 0 | 0 | 0 | 0 | 0 | 1 | 0 |
| ISYNA1   | Inositol-3-phosphate synthase 1                                                 | 61029.1    | 4.83947  | 0 | 0 | 0 | 0 | 0 | 0 | 0 | 1 |
| SPINK5   | Serine protease inhibitor Kazal-type 5                                          | 120636.6   | 6.836525 | 0 | 0 | 1 | 0 | 0 | 0 | 0 | 0 |
| NIT2     | Nitrilase homolog 2                                                             | 30588.56   | 4.541786 | 0 | 0 | 0 | 0 | 0 | 1 | 0 | 0 |
| AASDHPPT | L-amino acid oxidase semialdehyde dehydrogenase-phosphopantetheinyl transferase | 35753.07   | 5.651344 | 0 | 0 | 0 | 0 | 0 | 1 | 0 | 0 |
| HEBP1    | Heme-binding protein 1                                                          | 21083.52   | 4.518608 | 0 | 0 | 0 | 0 | 0 | 1 | 0 | 0 |
| KRT82    | Keratin, type II cuticular Hb2                                                  | 56616.32   | 5.039848 | 0 | 0 | 0 | 1 | 0 | 0 | 0 | 0 |

|           |                                                                                 |          |          |   |   |   |   |   |   |   |   |
|-----------|---------------------------------------------------------------------------------|----------|----------|---|---|---|---|---|---|---|---|
| MAN2C1    | Alpha-mannosidase 2C1                                                           | 115761.5 | 5.343941 | 0 | 0 | 0 | 0 | 0 | 1 | 0 | 0 |
| SEPT11    | Septin-11                                                                       | 49367.19 | 6.36     | 0 | 0 | 0 | 0 | 1 | 0 | 0 | 0 |
| POLR3E    | DNA-directed RNA polymerase III subunit<br>RPC5                                 | 79847.41 | 5.096779 | 0 | 0 | 0 | 0 | 0 | 1 | 0 | 0 |
| ADPRHL2   | Poly(ADP-rib e) glycohydrolase ARH3<br>Low-density lipoprotein receptor-related | 38922.17 | 4.95     | 0 | 0 | 0 | 0 | 1 | 0 | 0 | 0 |
| LRP1B     | protein 1B                                                                      | 515159.4 | 5.09     | 1 | 0 | 0 | 0 | 0 | 0 | 0 | 0 |
| RRBP1     | Ribosome-binding protein 1                                                      | 152380.7 | 8.126701 | 0 | 0 | 0 | 0 | 0 | 0 | 1 | 0 |
| SAE1      | SUMO-activating enzyme subunit 1                                                | 38425.56 | 4.847374 | 0 | 0 | 0 | 0 | 0 | 0 | 0 | 1 |
| MRC2      | C-type mannose receptor 2                                                       | 166548.9 | 4.793221 | 0 | 0 | 1 | 0 | 0 | 0 | 0 | 0 |
| CPNE7     | Copine-7                                                                        | 70249.18 | 5.97     | 1 | 0 | 0 | 0 | 0 | 0 | 0 | 0 |
| VPS29     | Vacuolar protein sorting-associated protein 29                                  | 20492.68 | 5.033974 | 0 | 0 | 1 | 0 | 0 | 0 | 0 | 0 |
| GRHPR     | Glyoxylate reductase/hydroxypyruvate<br>reductase                               | 35645.74 | 5.925102 | 0 | 0 | 0 | 1 | 0 | 0 | 0 | 0 |
| FBLN5     | Fibulin-5                                                                       | 50146.67 | 3.601524 | 0 | 0 | 0 | 0 | 0 | 0 | 0 | 1 |
| KLK11     | Kallikrein-11                                                                   | 31038.78 | 8.915184 | 0 | 0 | 1 | 0 | 0 | 0 | 0 | 0 |
| SRP68     | Signal recognition particle 68 kDa protein                                      | 70685.56 | 5.571236 | 0 | 0 | 1 | 0 | 0 | 0 | 0 | 0 |
| STEAP1    | Metalloreductase STEAP1                                                         | 39825.43 | 6.296486 | 0 | 0 | 0 | 0 | 0 | 0 | 0 | 1 |
| PUF60     | Poly(U)-binding-splicing factor PUF60                                           | 59837.62 | 4.733727 | 0 | 0 | 0 | 0 | 0 | 1 | 0 | 0 |
| C21orf104 | Putative uncharacterized C21orf104 protein                                      | 16526.34 | 5.39222  | 0 | 0 | 0 | 0 | 0 | 0 | 0 | 1 |
|           | Myristoy<br>lated<br>alanine-<br>rich C-<br>kinase<br>substrate                 |          |          | 0 | 1 | 0 | 0 | 0 | 0 | 0 | 0 |
|           | MARCKS                                                                          |          | 31535.86 |   |   |   |   |   |   |   |   |
| TMPRSS11  |                                                                                 |          |          |   |   |   |   |   |   |   |   |
| E         | Transmembrane protease, serine 11E                                              | 47665.08 | 8.85     | 1 | 0 | 0 | 0 | 0 | 0 | 0 | 0 |
| DNPEP     | Aspartyl aminopeptidase                                                         | 52394.92 | 6.175362 | 0 | 0 | 0 | 0 | 0 | 1 | 0 | 0 |
| SLC7A7    | Y+L amino acid transporter 1                                                    | 55954.25 | 3.889488 | 0 | 0 | 0 | 0 | 0 | 0 | 1 | 0 |

|         |                                                |          |          |   |   |   |   |   |   |   |   |
|---------|------------------------------------------------|----------|----------|---|---|---|---|---|---|---|---|
| COL17A1 | Collagen alpha-1(XVII) chain                   | 150326.5 | 5.470726 | 0 | 0 | 1 | 0 | 0 | 0 | 0 | 0 |
| PRPF19  | Pre-mRNA-processing factor 19                  | 55146.34 | 5.345436 | 0 | 0 | 0 | 0 | 0 | 1 | 0 | 0 |
| NDRG2   | Protein NDRG2                                  | 40772.18 | 5.08     | 0 | 0 | 0 | 0 | 1 | 0 | 0 | 0 |
| RPH3AL  | Rab effector Noc2                              | 34442.33 | 8.886024 | 0 | 0 | 0 | 0 | 0 | 1 | 0 | 0 |
| CLCA2   | Calcium-activated chloride channel regulator 2 | 103875.5 | 5.218758 | 0 | 0 | 1 | 0 | 0 | 0 | 0 | 0 |
| NCKAP1  | Nck-associated protein 1                       | 128706.5 | 6.18     | 1 | 0 | 0 | 0 | 0 | 0 | 0 | 0 |
| GDA     | Guanine deaminase                              | 50970.57 | 4.694527 | 0 | 0 | 0 | 0 | 0 | 1 | 0 | 0 |
| LSM2    | U6 snRNA-associated Sm-like protein LSm2       | 10827.63 | 4.674446 | 0 | 0 | 0 | 0 | 0 | 0 | 0 | 1 |
| CAB39   | Calcium-binding protein 39                     | 39843.74 | 6.43     | 0 | 0 | 0 | 0 | 1 | 0 | 0 | 0 |
| F11R    | Junctional adhesion molecule A                 | 32562.49 | 4.812019 | 0 | 0 | 1 | 0 | 0 | 0 | 0 | 0 |
| CLIC4   | Chloride intracellular channel protein 4       | 28753.74 | 4.823128 | 0 | 0 | 0 | 0 | 0 | 1 | 0 | 0 |
| AP1M2   | AP-1 complex subunit mu-2                      | 48078.17 | 8.23     | 0 | 0 | 0 | 0 | 1 | 0 | 0 | 0 |
| FCGBP   | IgGFc-binding protein                          | 571638.8 | 4.395241 | 0 | 0 | 0 | 0 | 0 | 1 | 0 | 0 |

---

Table S5. The list of proteins previously reported in the serum of head and neck cancer patients

| Protein name                                            | Gene name | Swissprot AC | Specimen      |
|---------------------------------------------------------|-----------|--------------|---------------|
| Interleukin-8                                           | IL-8      | P10145       | saliva, serum |
| Interleukin-6                                           | IL-6      | P05231       | saliva, serum |
| Matrix metalloproteinase-2                              | MMP-2     | P08253       | serum         |
| Matrix metalloproteinase-3                              | MMP-3     | P08254       | serum         |
| Pro-epidermal growth factor                             | EGF       | P01133       | serum         |
| Alpha-fetoprotein                                       | AFP       | P02771       | serum         |
| Keratin-19                                              | KRT19     | P08727       | serum         |
| Galectin-3-binding protein                              | M2BP      | Q08380       | saliva        |
| Protein S100-A9                                         | S100A9    | P06702       | saliva        |
| CD59 glycoprotein                                       | CD59      | P13987       | saliva        |
| Catalase                                                | CAT       | P04040       | saliva        |
| Profilin-1                                              | PFN1      | P07737       | saliva        |
| Matrix metalloproteinase-13                             | MMP13     | P45452       | serum         |
| Actin, alpha skeletal muscle                            | ACTA1     | P68133       | saliva        |
| Myosin-1                                                | MYH1      | P12882       | saliva        |
| Epidermal growth factor receptor                        | EGFR      | A8K2T7       | serum         |
| Signal transducer and activator of transcription 3      | STAT3     | P40763       | saliva        |
| Thioredoxin-dependent peroxide reductase, mitochondrial | PRDX3     | P30048       | saliva        |
| Serpin B3                                               | SERPINB3  | P29508       | saliva        |
| Fibrinogen alpha chain                                  | FGA       | P02671       | plasma        |
| Ig gamma-3 chain C region                               | IGHG3     | P01860       | plasma        |
| Ig Kappa chain C region                                 | IGKC      | P01834       | plasma        |
| Heat shock 70 kDa protein 1A/1B                         | HSPA1A    | P08107       | serum         |
| SICAM-1                                                 | sICAM1    | Q99930       | serum         |
| Serum amyloid A-1 protein                               | SAA1      | P0DJ18       | serum         |

## Reference

- [1] K. D. Lee, H . S. Lee, C .H. Jeon, Body fluid biomarkers for early detection of head and neck squamous cell carcinomas. *Anticancer Res* 31(2011), 1161-1167.
- [2] T. B. Schaaij-Visser, R. H. Brakenhoff, C. R. Leemans, A. J. Heck, M. Slijper, Protein biomarker discovery for head and neck cancer. *J Proteomics* 73 (2010), 1790-1803.

- [3] T. M. Rezende, M. de Souza Freire, O. L. Franco, Head and neck cancer: proteomic advances and biomarker achievements. *Cancer* 116 (2010), 4914-4925.

Table S6. Forty-nine candidate biomarkers of laryngeal SCC in the “secretory/releasing” database

| Protein name                                          | Gene name | Swissprot AC | Subcellular location                                            |
|-------------------------------------------------------|-----------|--------------|-----------------------------------------------------------------|
| Serum albumin                                         | ALB       | P02768       | Secreted                                                        |
| Gelsolin                                              | GSN       | P06396       | Cytoplasm. Secreted                                             |
| Protein disulfide-isomerase                           | P4HB      | P07237       | Endoplasmic reticulum lumen. Melanosome. Cell membrane          |
| Annexin A2                                            | ANXA2     | P07355       | Secreted. Melanosome                                            |
| Thrombospondin-1                                      | THBS1     | P07996       | Secreted                                                        |
| Vinculin                                              | VCL       | P18206       | Cytoplasm. Cell junction. Cell membrane                         |
| Lumican                                               | LUM       | P51884       | Secreted                                                        |
| Transforming growth factor-beta-induced protein ig-h3 | TGFB1     | Q15582       | Secreted                                                        |
| Protein S100-A8                                       | S100A8    | P05109       | Secreted. Cytoplasm. Cell membrane                              |
| Plasminogen activator inhibitor 1                     | SERPINE1  | P05121       | Secreted                                                        |
| Epithelial cadherin                                   | CDH1      | P12830       | Cell junction. Cell membrane. Endosome. Golgi apparatus         |
| Tenascin                                              | TNC       | P24821       | Secreted                                                        |
| Calreticulin                                          | CALR      | P27797       | Endoplasmic reticulum lumen. Cytoplasm. Secreted. Cell surface. |
| Metalloproteinase inhibitor 1                         | TIMP1     | P01033       | Secreted                                                        |
| Matrix metalloproteinase-9                            | MMP9      | P14780       | Secreted                                                        |
| Tenascin-X                                            | TNXB      | P22105       | Secreted                                                        |
| von Willebrand factor                                 | VWF       | P04275       | Secreted                                                        |
| Glutathione peroxidase 3                              | GPX3      | P22352       | Secreted                                                        |
| Chitinase-3-like protein 1                            | CHI3L1    | P36222       | Secreted                                                        |
| Transgelin-2                                          | TAGLN2    | P37802       | nuclear membrane. Plasma membrane                               |
| Polymeric immunoglobulin receptor                     | PIGR      | P01833       | Cell membrane. Secreted                                         |
| Interleukin-1 receptor antagonist protein             | IL1RN     | P18510       | Secreted. Cytoplasm                                             |
| Antithrombin-III                                      | SERPINC1  | P01008       | Secreted                                                        |
| Alpha-1-antichymotrypsin                              | SERPINA3  | P01011       | Secreted                                                        |
| Vitronectin                                           | VTN       | P04004       | Secreted                                                        |



|                                              |          |        |                                                        |
|----------------------------------------------|----------|--------|--------------------------------------------------------|
| Plasma protease C1 inhibitor                 | SERPING1 | P05155 | Secreted                                               |
| Collagen alpha-2(I) chain                    | COL1A2   | P08123 | Secreted                                               |
| Leukocyte elastase                           | ELA2     | P08246 | Cell surface. Secreted                                 |
| Monocyte differentiation antigen CD14        | CD14     | P08571 | Cell membrane                                          |
| SPARC                                        | SPARC    | P09486 | Secreted                                               |
| Thioredoxin                                  | TXN      | P10599 | Nucleus. Cytoplasm. Secreted                           |
| Tryptase alpha-1                             | TPSAB1   | P15157 | Secreted                                               |
| Metalloproteinase inhibitor 2                | TIMP2    | P16035 | Secreted                                               |
| Pigment epithelium-derived factor            | SERPINF1 | P36955 | Secreted                                               |
| Kallikrein-6                                 | KLK6     | Q92876 | Secreted. Nucleus. Cytoplasm. Mitochondrion. Microsome |
| Insulin                                      | INS      | P01308 | Secreted                                               |
| Beta-2-glycoprotein 1                        | APOH     | P02749 | Secreted                                               |
| Alpha-2-HS-glycoprotein                      | AHSG     | P02765 | Secreted                                               |
| Alpha-1B-glycoprotein                        | A1BG     | P04217 | Secreted                                               |
| Amyloid beta A4 protein                      | APP      | P05067 | Membrane                                               |
| Trypsin-1                                    | PRSS1    | P07477 | Secreted                                               |
| Clusterin                                    | CLU      | P10909 | Secreted                                               |
| Versican core protein                        | VCAN     | P13611 | Secreted                                               |
| Inter-alpha-trypsin inhibitor heavy chain H2 | ITIH2    | P19823 | Secreted                                               |
| Fibulin-1                                    | FBLN1    | P23142 | Secreted                                               |
| Zinc-alpha-2-glycoprotein                    | AZGP1    | P25311 | Secreted                                               |
| Thrombospondin-2                             | THBS2    | P35442 | Secreted                                               |
| Dermcidin                                    | DCD      | P81605 | Secreted                                               |
| Procollagen C-endopeptidase enhancer 1       | PCOLCE   | Q15113 | Secreted                                               |

---

Table S7. The performance of KLK6 in distinguishing cancer cases from controls at selected cutoff points

| Application | Cutoff<br>(ng/ml) | Sensitivity<br>(%) | Specificity<br>(%) | Early stage <sup>*</sup><br>(%) |
|-------------|-------------------|--------------------|--------------------|---------------------------------|
| C-H         | 7.31              | 29.5               | 90.3               | 27.7                            |
| C-B         | 6.28              | 36.2               | 82.1               | 41.5                            |
| C-NC        | 6.34              | 35.6               | 82.2               | 40.0                            |

<sup>\*</sup> comprised of cases with stage I and stage II.

C-H: distinguish cancer cases from healthy cases; C-B: distinguish cancer cases from benign cases; C-NC: distinguish cancer cases from non-cancer cases (including healthy cases and benign cases).
