# Supplementary material for: Identification of Human Tissue Kallikrein 6 as a Potential Marker of Laryngeal Cancer Based on the Relevant Secretory/Releasing Protein Database
Source: Hindawi journal article supplement (doi:10.1155/2014/594093), 2014-01-01

0h

48h

A

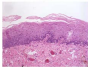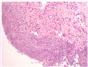

B

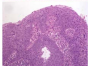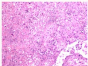



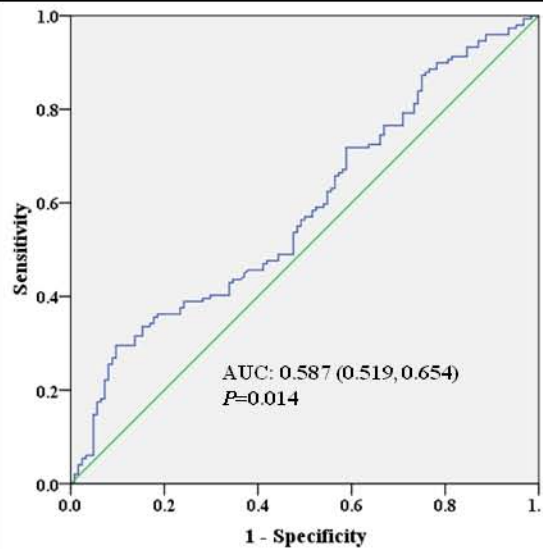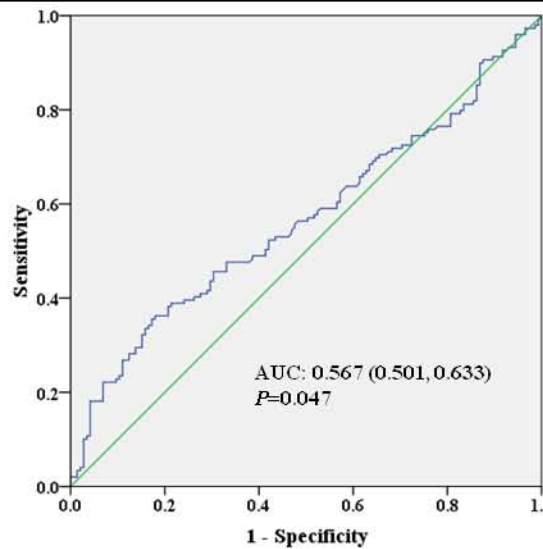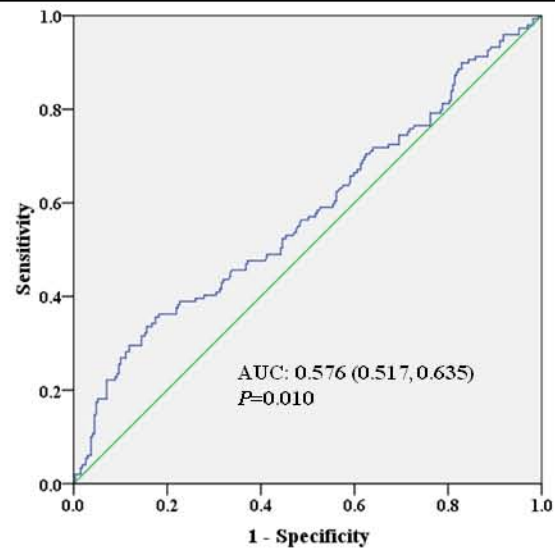

Supplement: f2 [file 594093.f2.pdf]
